# Supplementary material
Source: ML conference proceedings conference paper supplement (https://openreview.net/forum?id=U4gD6pQQkG)

PartitionerExplainer-MDP Predictions Class 0

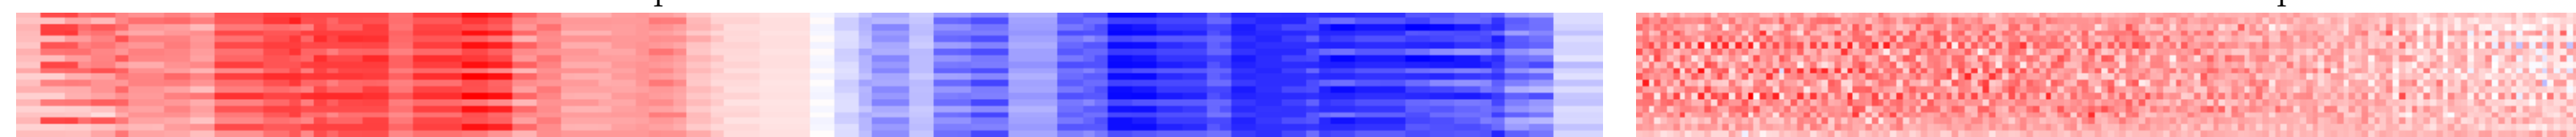

GradExplainer Predictions Class 0

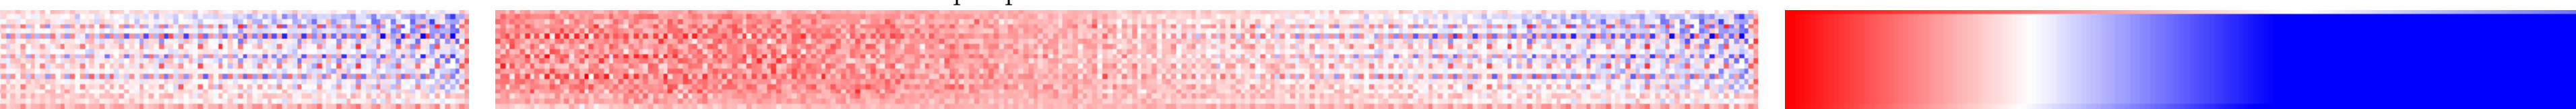

DeepExplainer Predictions Class 0

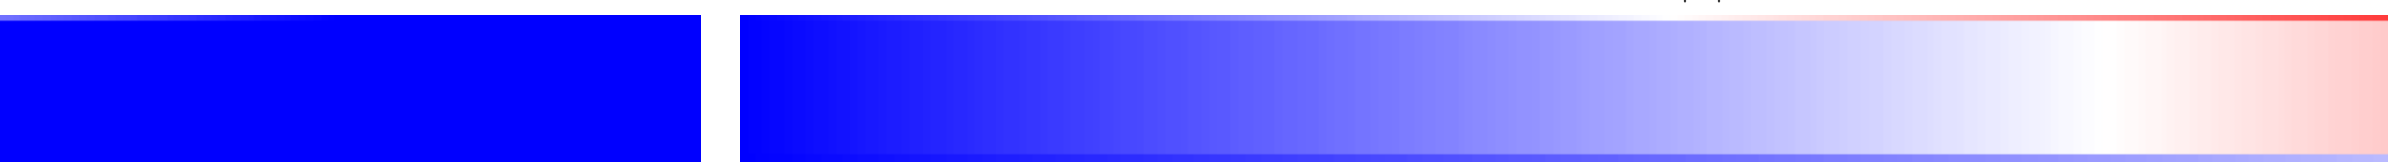

Grad-Cam Class 0

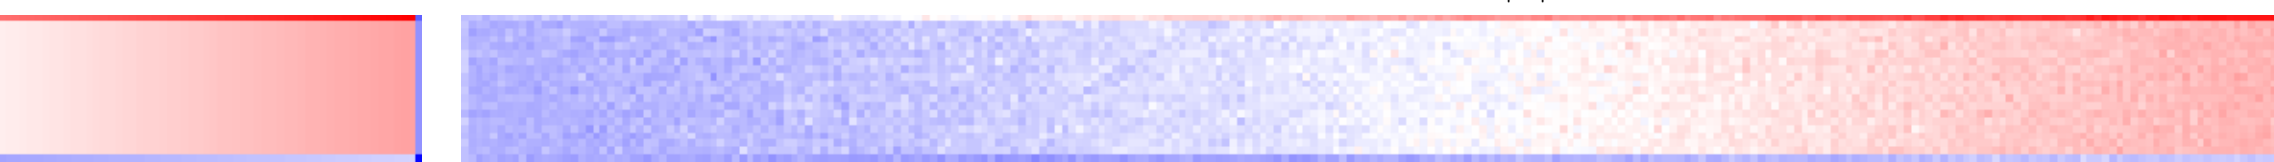

Grad-Cam++ Class 0



Smoothed Grad-Cam++ Class 0



PartitionerExplainer-MDP Predictions Class 1

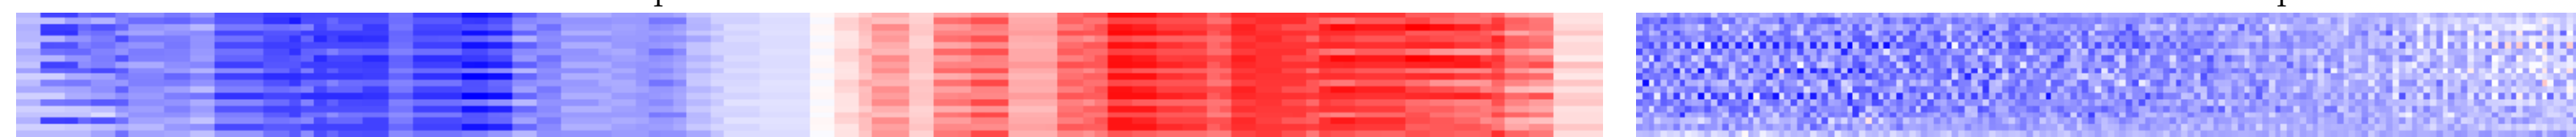

GradExplainer Predictions Class 1

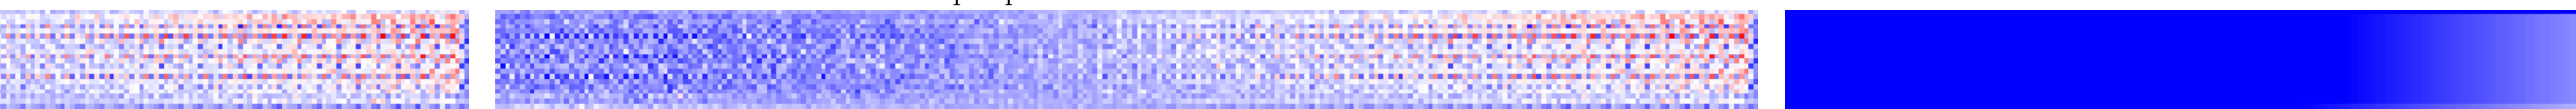

DeepExplainer Predictions Class 1

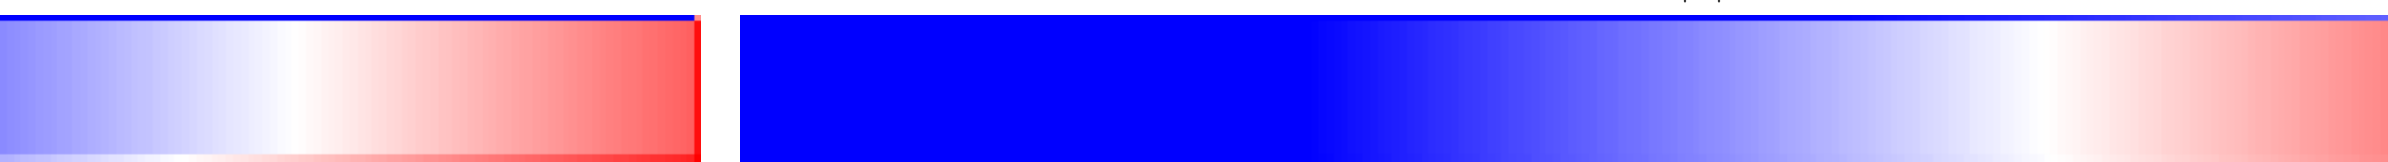

Grad-Cam Class 0

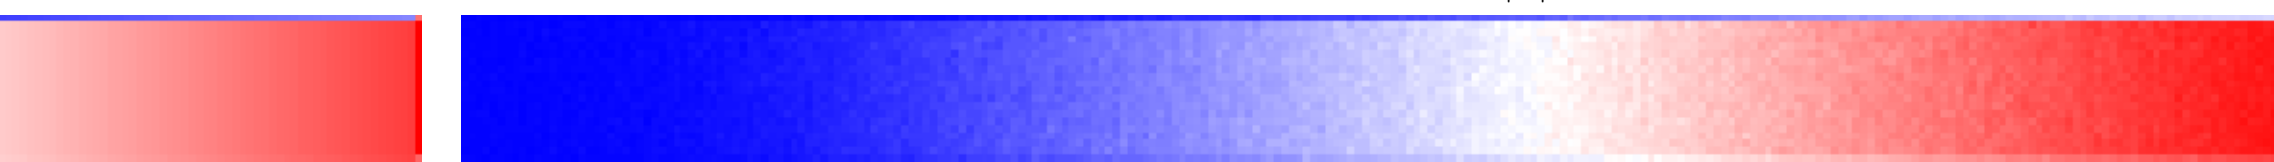

Grad-Cam++ Class 0



Smoothed Grad-Cam++ Class 0



Supplement: supplementary_material [file explainer_results.pdf › supplementary_material/app/results/explainer_results.pdf]
