# Supplementary material
Source: ML conference proceedings conference paper supplement (https://openreview.net/forum?id=U4gD6pQQkG)

Predicted Shapley Values Class 0  $\hat{\phi}_0$

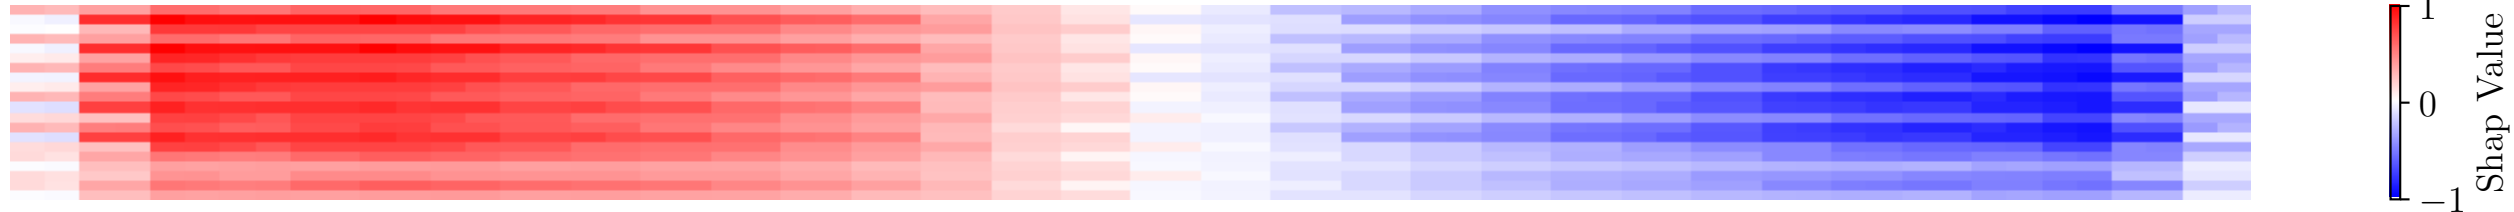

Residuals Class 0  $\epsilon_0$

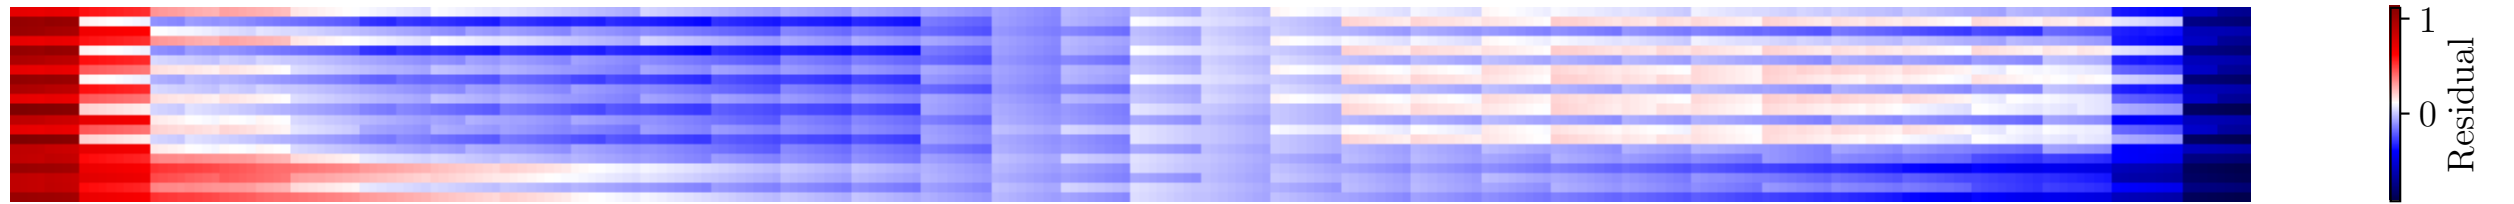

Predicted Shapley Values Class 1  $\hat{\phi}_1$

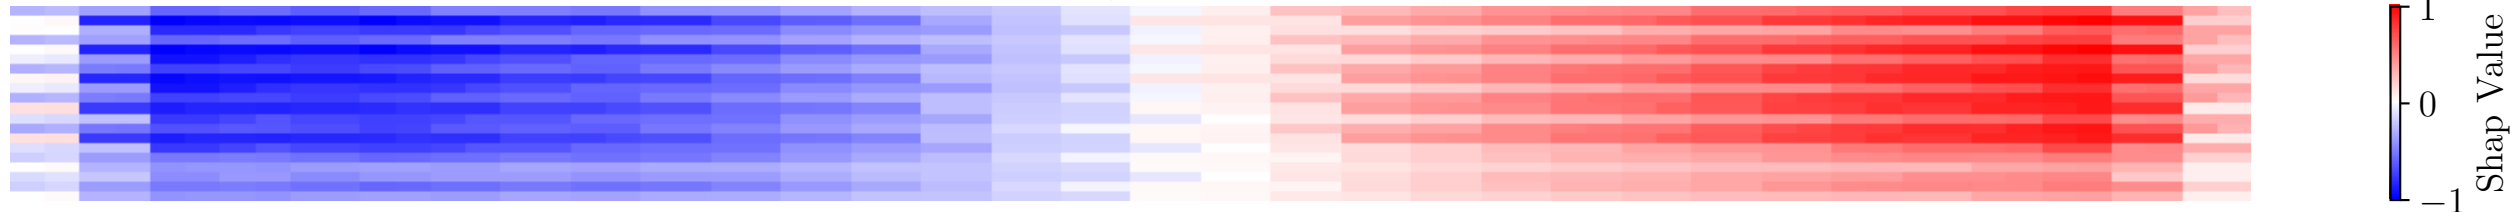

Residuals Class 1  $\epsilon_1$

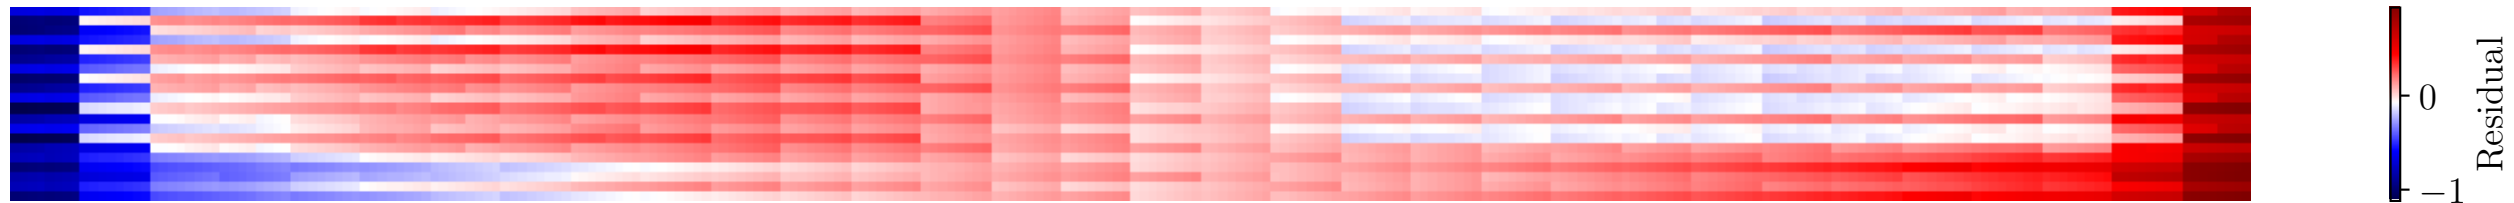

Supplement: supplementary_material [file L_eva_blur_101.pdf › supplementary_material/app/figs/L_eva_blur_101.pdf]
