# Supplementary material
Source: ML conference proceedings conference paper supplement (https://openreview.net/forum?id=U4gD6pQQkG)

Grayscale Image

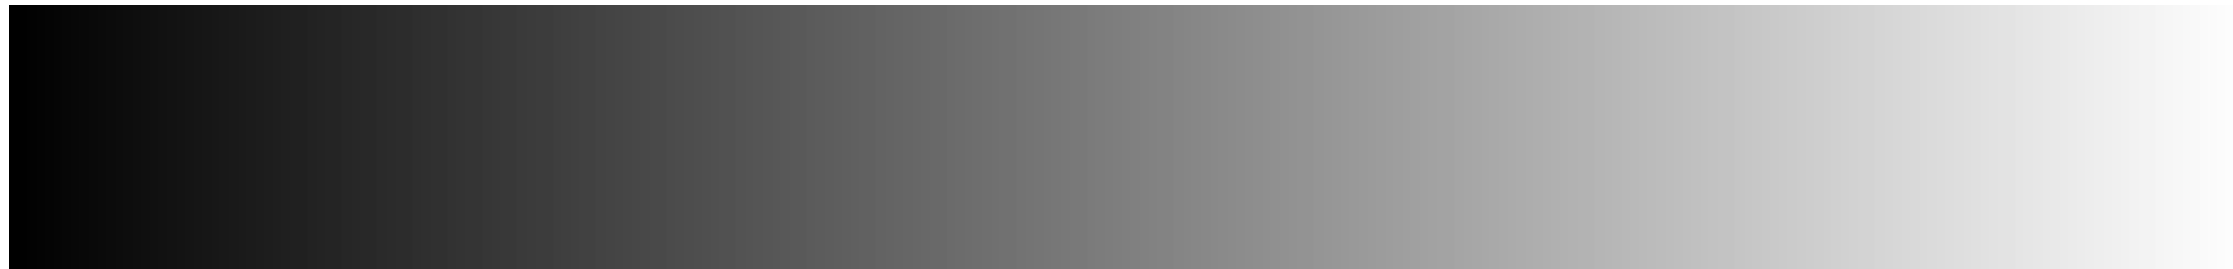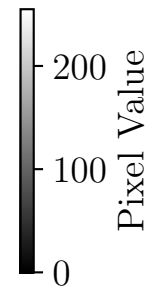

Ground Truth Shapley Values - Class 0

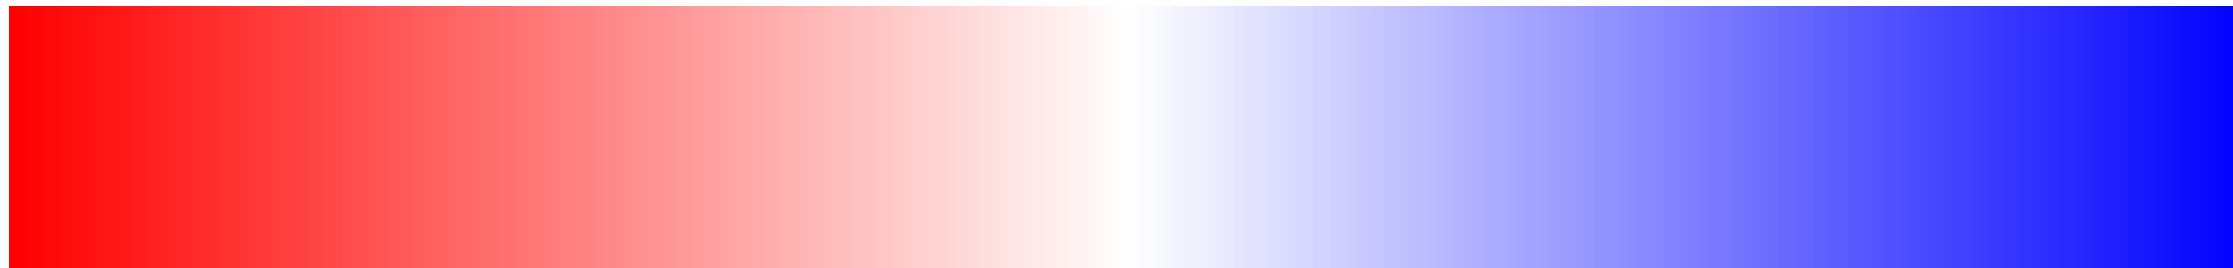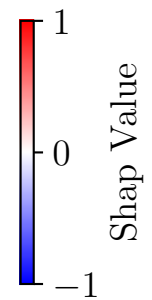

Ground Truth Shapley Values - Class 1

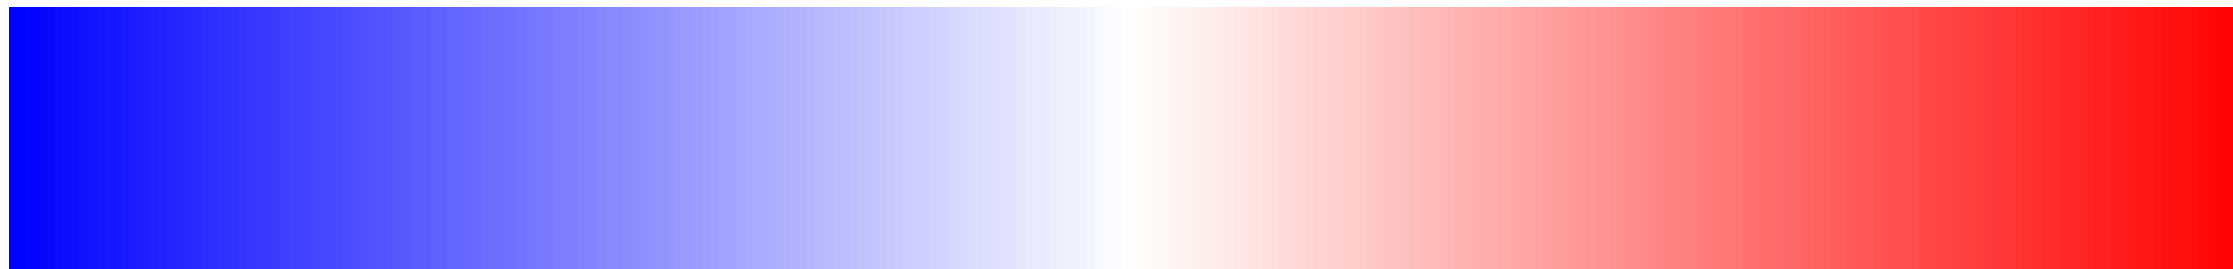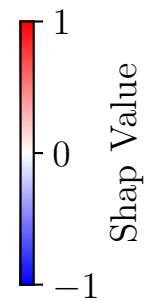

Supplement: supplementary_material [file ground_truth.pdf › supplementary_material/app/figs/ground_truth.pdf]

## a) Model Architecture

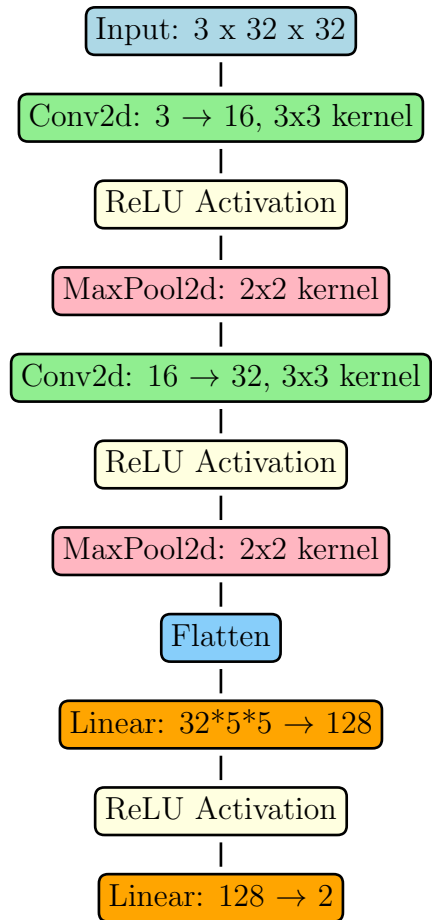

## b) Train and Validation Metrics

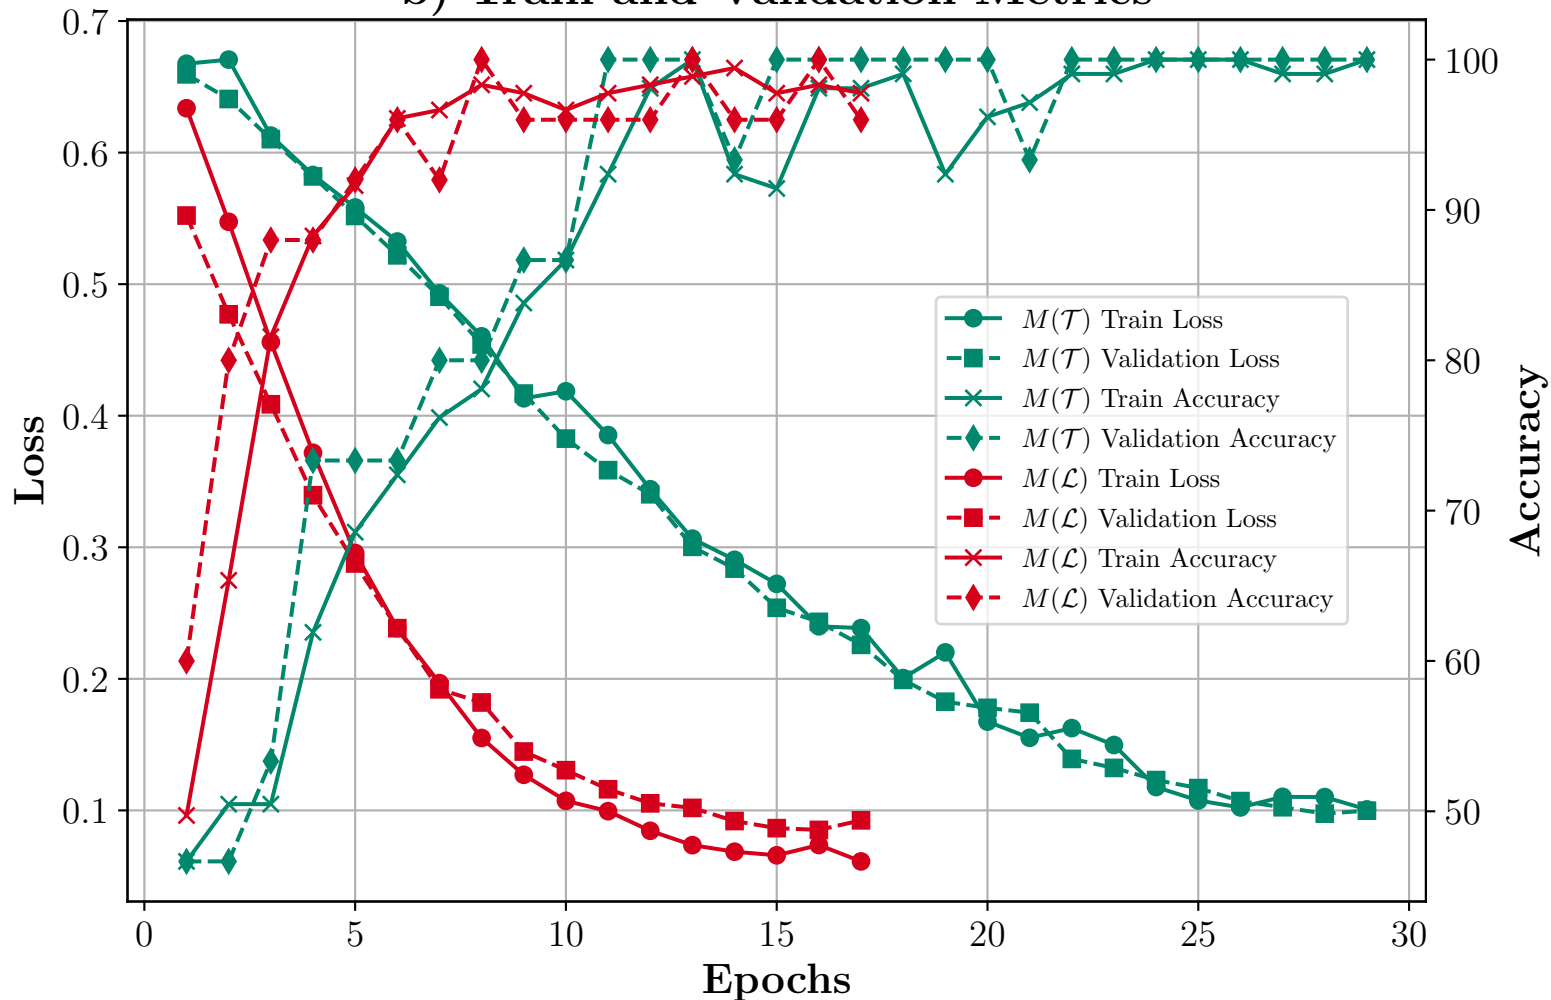

Supplement: supplementary_material [file model_results.pdf › supplementary_material/app/results/model_results.pdf]

American\_egret

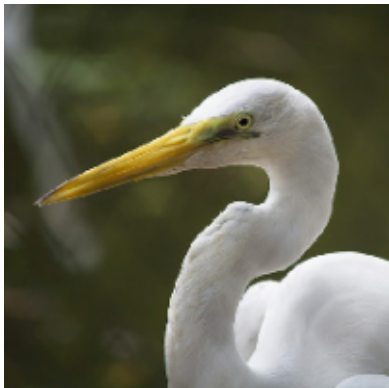

American\_egret

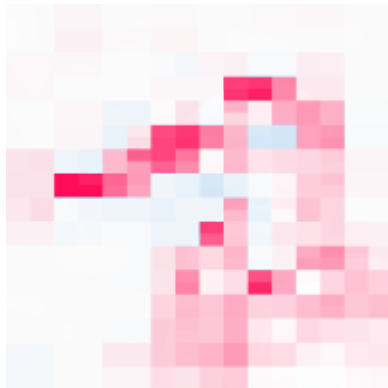

crane

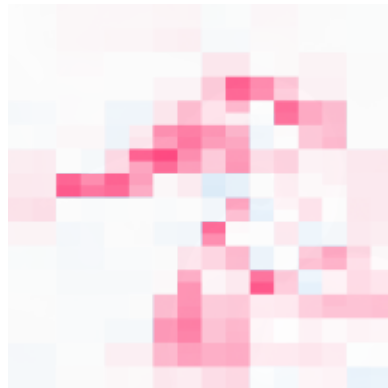

little\_blue\_heron

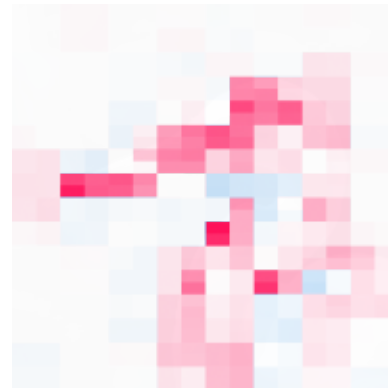

spoonbill

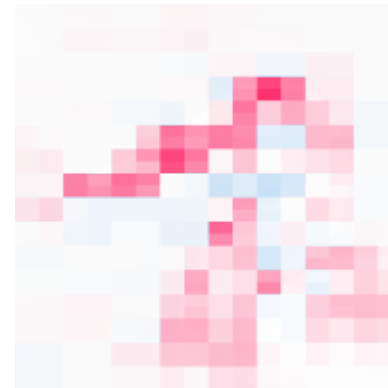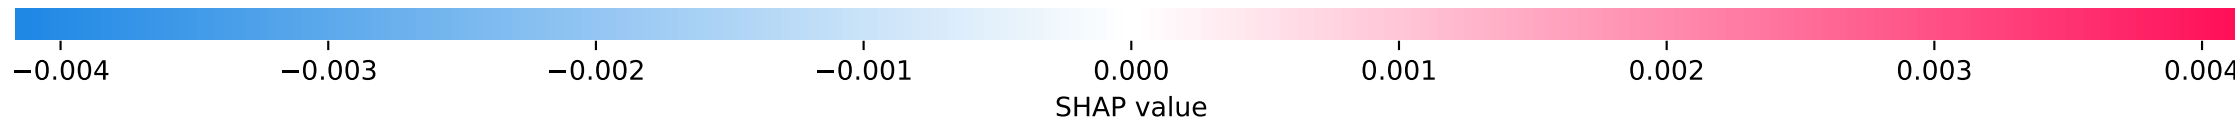

Supplement: supplementary_material [file mobilnet_blurring.pdf › supplementary_material/examples/figs/mobilnet_blurring.pdf]

American\_egret

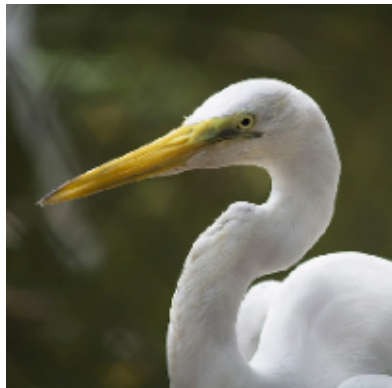

stove

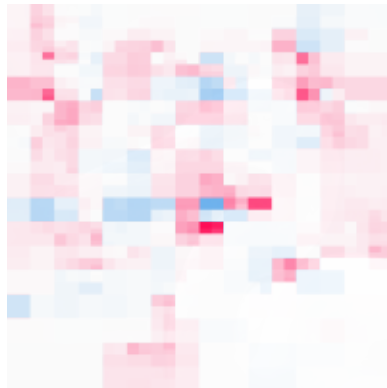

fire\_screen

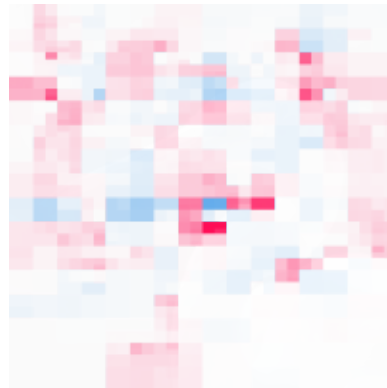

digital\_clock

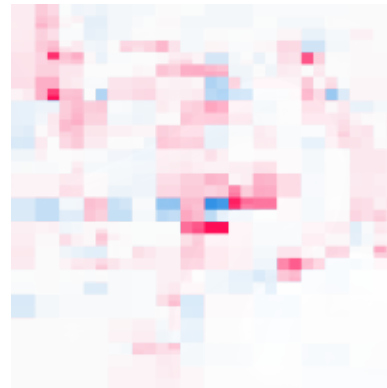

traffic\_light

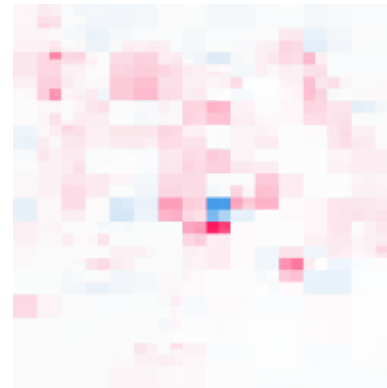

-0.010

-0.005

0.000

0.005

0.010

SHAP value

Supplement: supplementary_material [file mobilnet_inpaint_ns.pdf › supplementary_material/examples/figs/mobilnet_inpaint_ns.pdf]

American\_egret

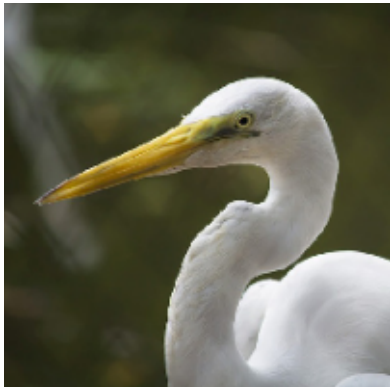

stove

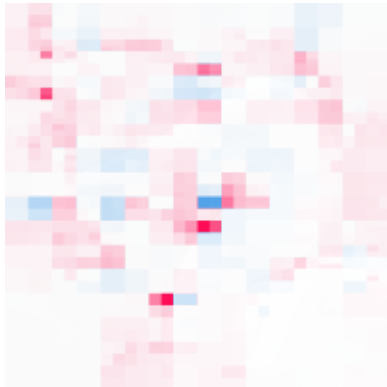

fire\_screen

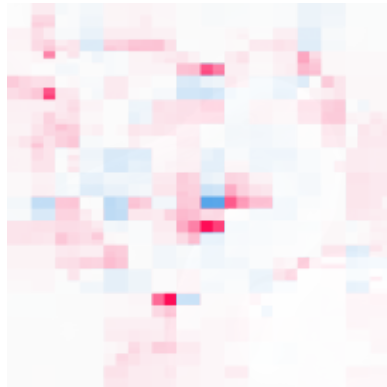

digital\_clock

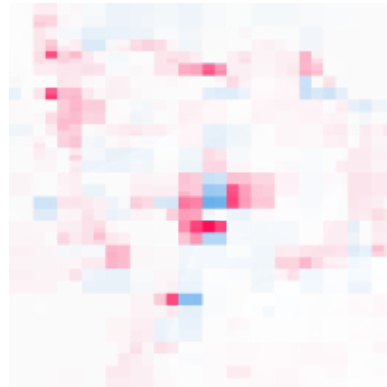

traffic\_light

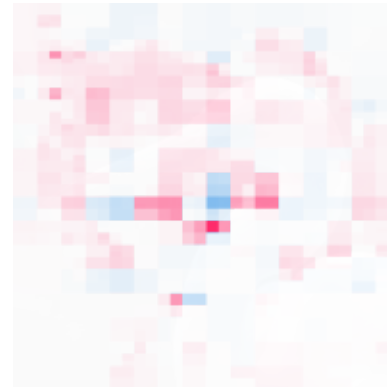

-0.010

-0.005

0.000

0.005

0.010

SHAP value

Supplement: supplementary_material [file mobilnet_inpaint_telea.pdf › supplementary_material/examples/figs/mobilnet_inpaint_telea.pdf]

American\_egret

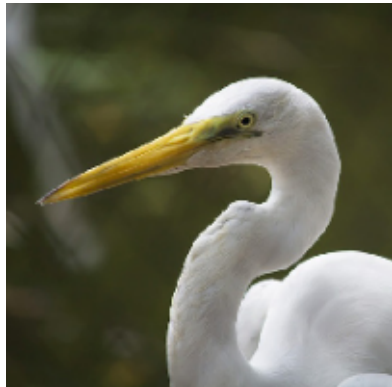

American\_egret

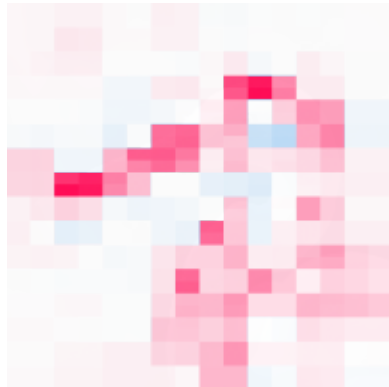

crane

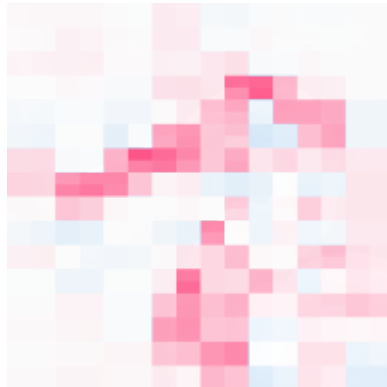

little\_blue\_heron

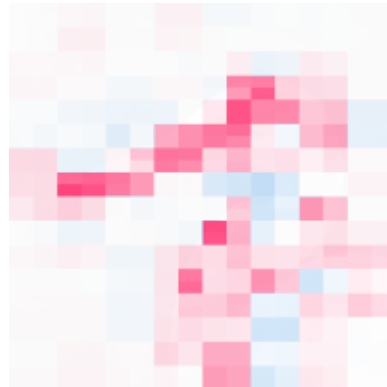

spoonbill

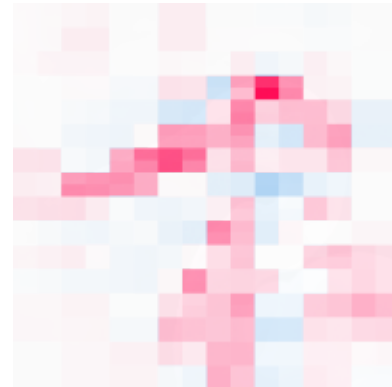

-0.004

-0.003

-0.002

-0.001

0.000

0.001

0.002

0.003

0.004

SHAP value

Supplement: supplementary_material [file mobilnet_inpaint_udp_black.pdf › supplementary_material/examples/figs/mobilnet_inpaint_udp_black.pdf]

American\_egret



American\_egret

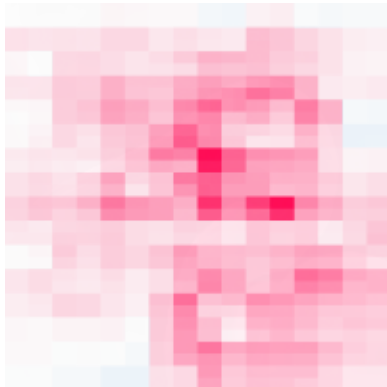

crane

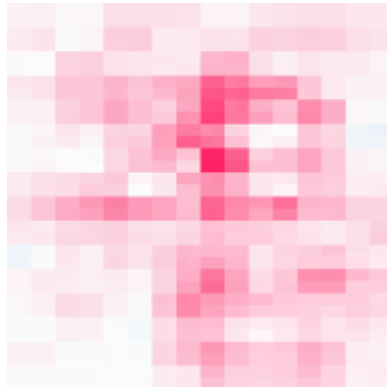

little\_blue\_heron

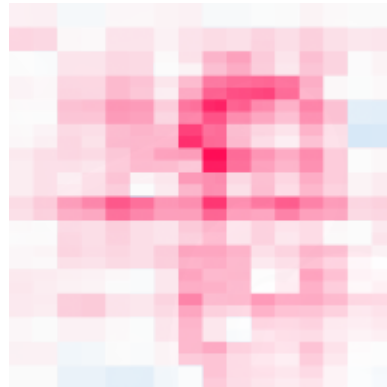

spoonbill

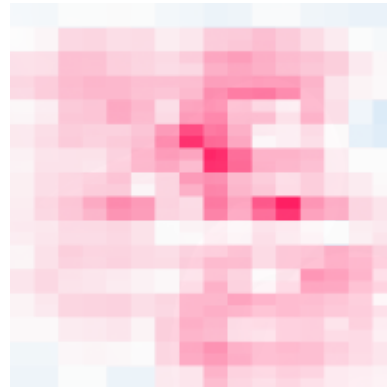

-0.002

-0.001

0.000

0.001

0.002

SHAP value

Supplement: supplementary_material [file mobilnet_inpaint_udp_white.pdf › supplementary_material/examples/figs/mobilnet_inpaint_udp_white.pdf]

American\_egret



American\_egret

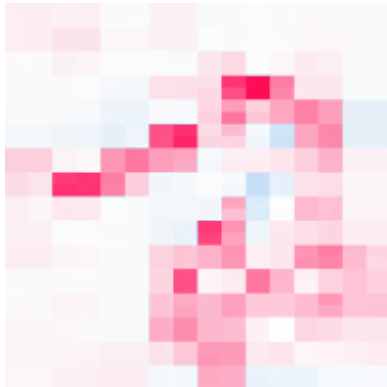

crane

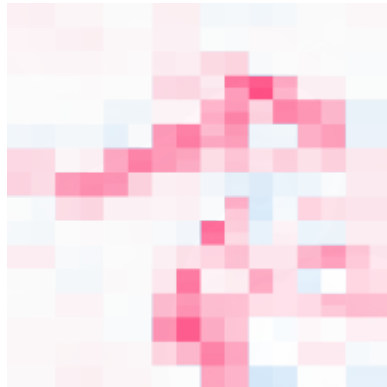

little\_blue\_heron

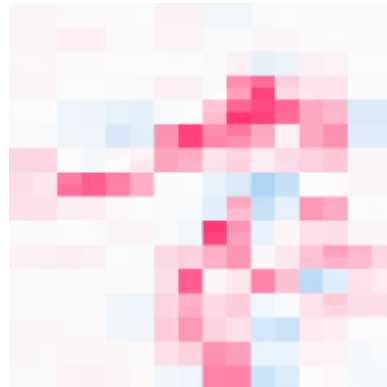

spoonbill

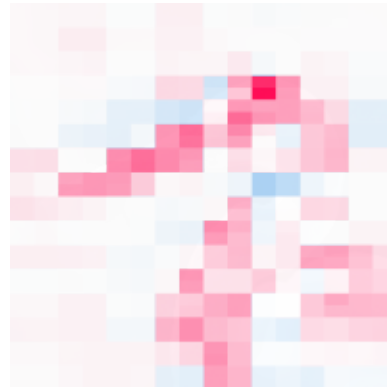

-0.003

-0.002

-0.001

0.000

0.001

0.002

0.003

SHAP value

Supplement: supplementary_material [file mobilnet_mdp.pdf › supplementary_material/examples/figs/mobilnet_mdp.pdf]

American\_egret

crane

little\_blue\_heron

flamingo

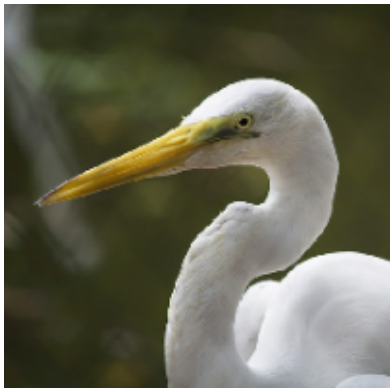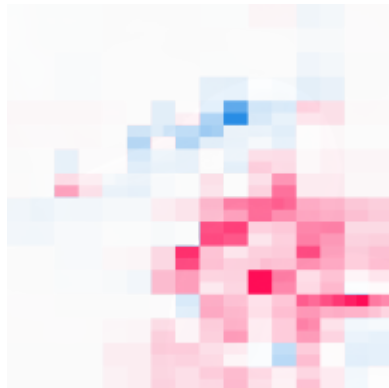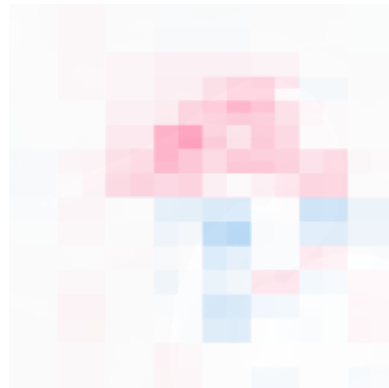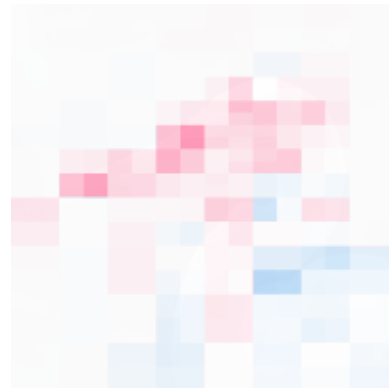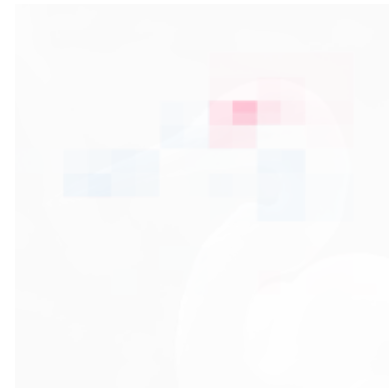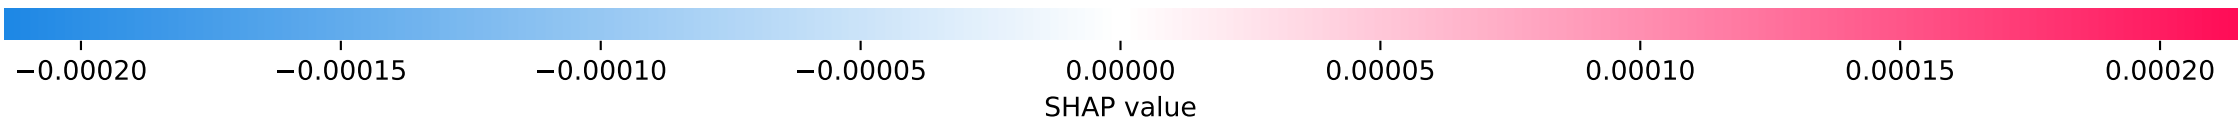

Supplement: supplementary_material [file resnet_blurring.pdf › supplementary_material/examples/figs/resnet_blurring.pdf]

American\_egret

crane

little\_blue\_heron

flamingo

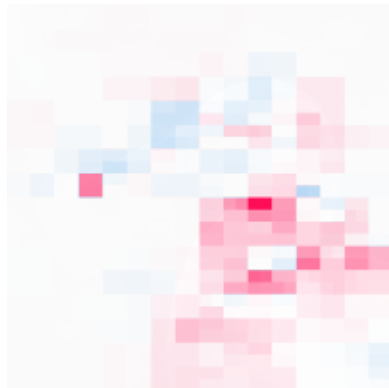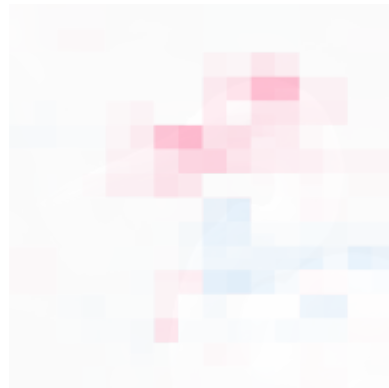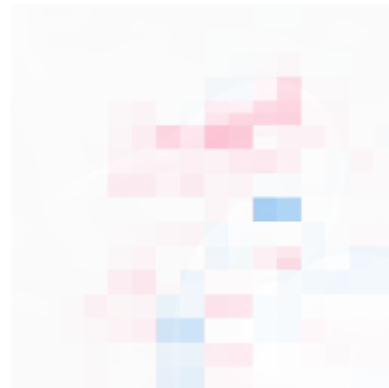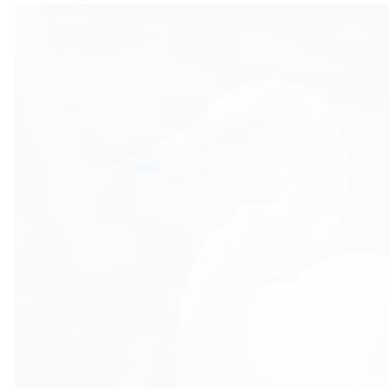

-0.0003

-0.0002

-0.0001

0.0000

0.0001

0.0002

0.0003

SHAP value

Supplement: supplementary_material [file resnet_inpaint_ns.pdf › supplementary_material/examples/figs/resnet_inpaint_ns.pdf]

American\_egret

crane

little\_blue\_heron

flamingo

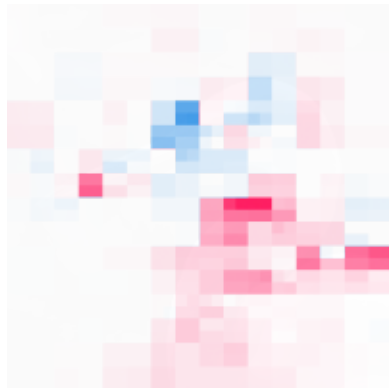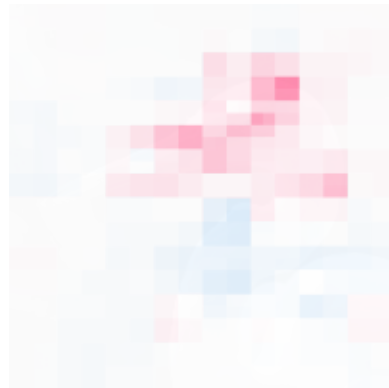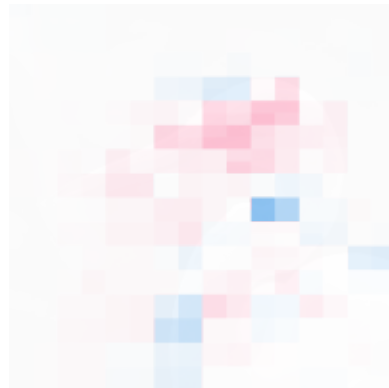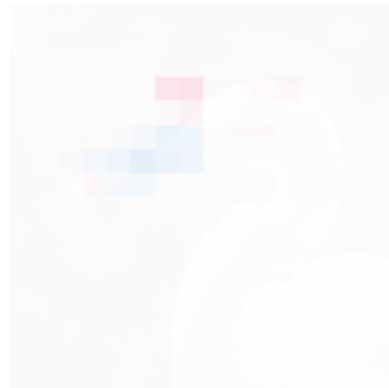

-0.0003

-0.0002

-0.0001

0.0000

0.0001

0.0002

0.0003

SHAP value

Supplement: supplementary_material [file resnet_inpaint_telea.pdf › supplementary_material/examples/figs/resnet_inpaint_telea.pdf]

American\_egret

crane

little\_blue\_heron

flamingo

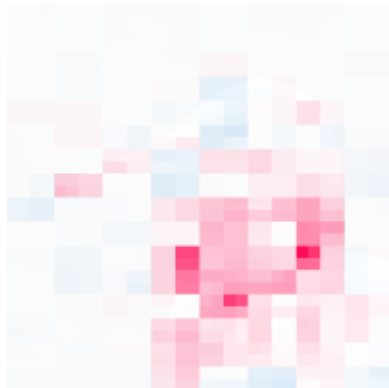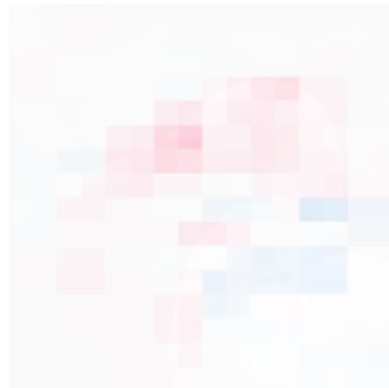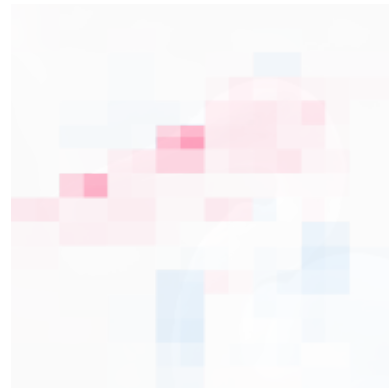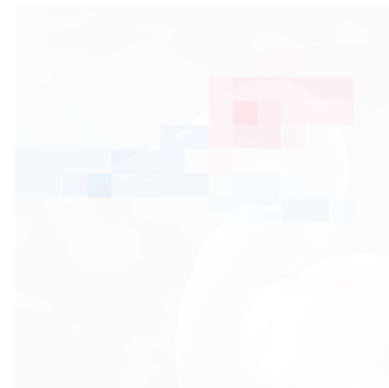

-0.0003

-0.0002

-0.0001

0.0000

0.0001

0.0002

0.0003

SHAP value

Supplement: supplementary_material [file resnet_mdp.pdf › supplementary_material/examples/figs/resnet_mdp.pdf]

American\_egret

crane

little\_blue\_heron

flamingo

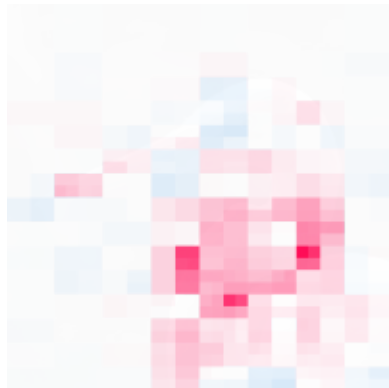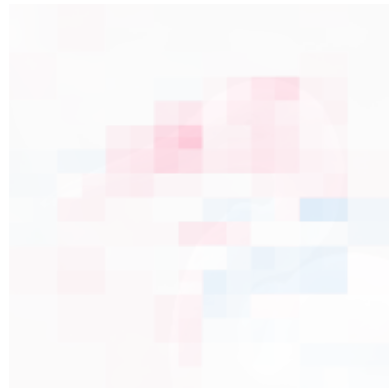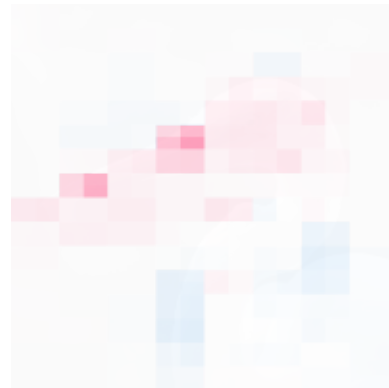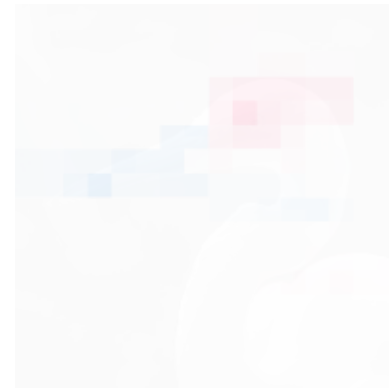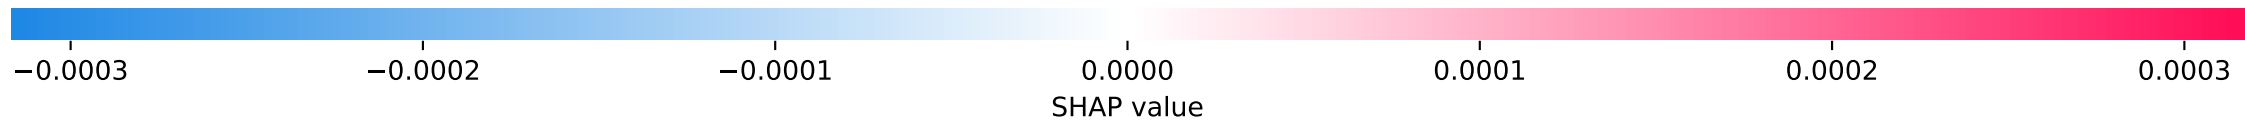

Supplement: supplementary_material [file resnet_udp_black.pdf › supplementary_material/examples/figs/resnet_udp_black.pdf]

American\_egret

crane

little\_blue\_heron

flamingo

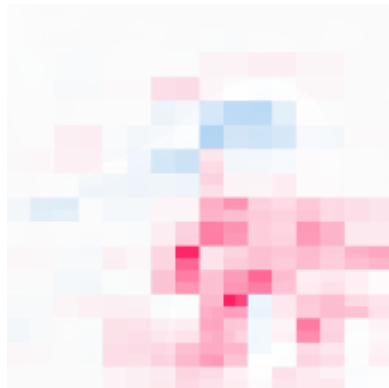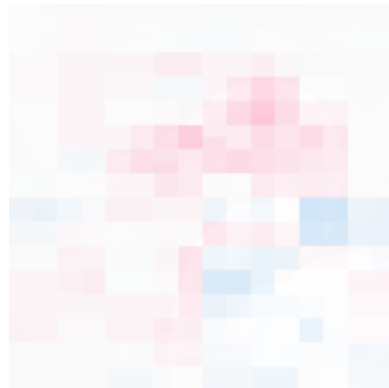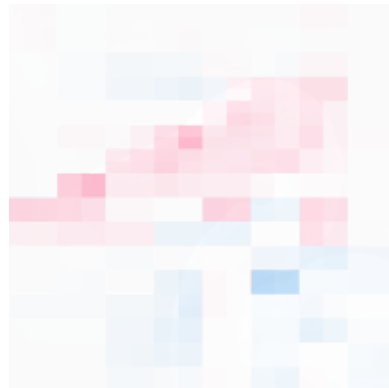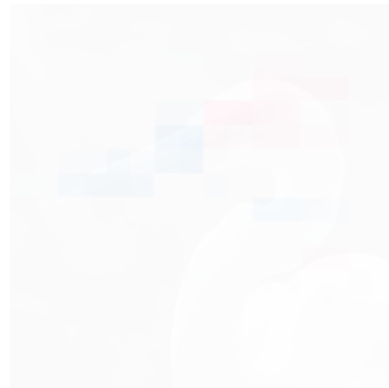

-0.0002

-0.0001

0.0000

0.0001

0.0002

SHAP value

Supplement: supplementary_material [file resnet_udp_white.pdf › supplementary_material/examples/figs/resnet_udp_white.pdf]

Original

Blurring

Inpaint Telea

Inpaint NS

UCR - Black

Our Approach

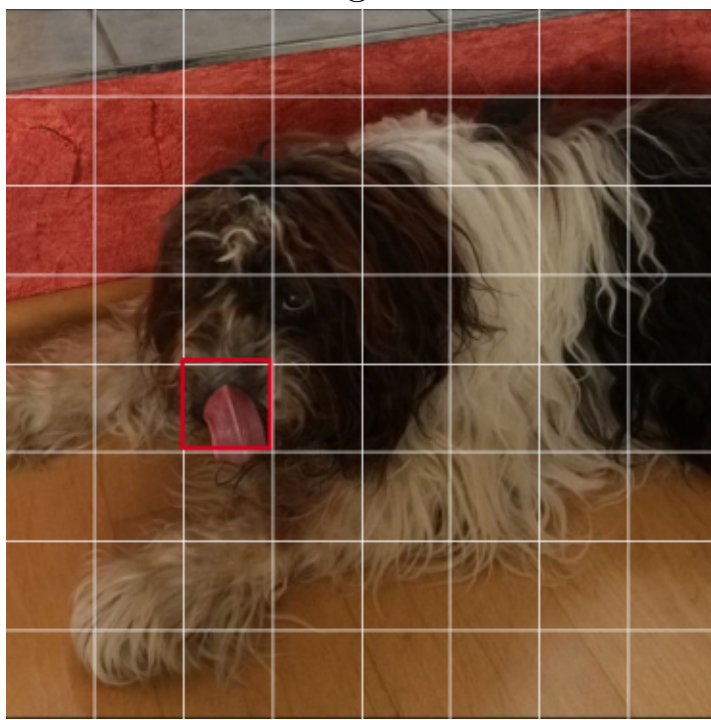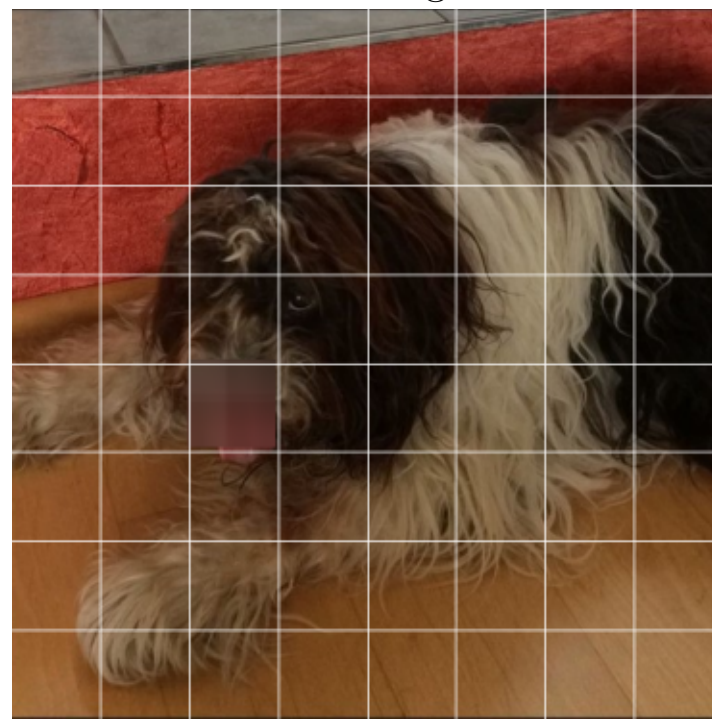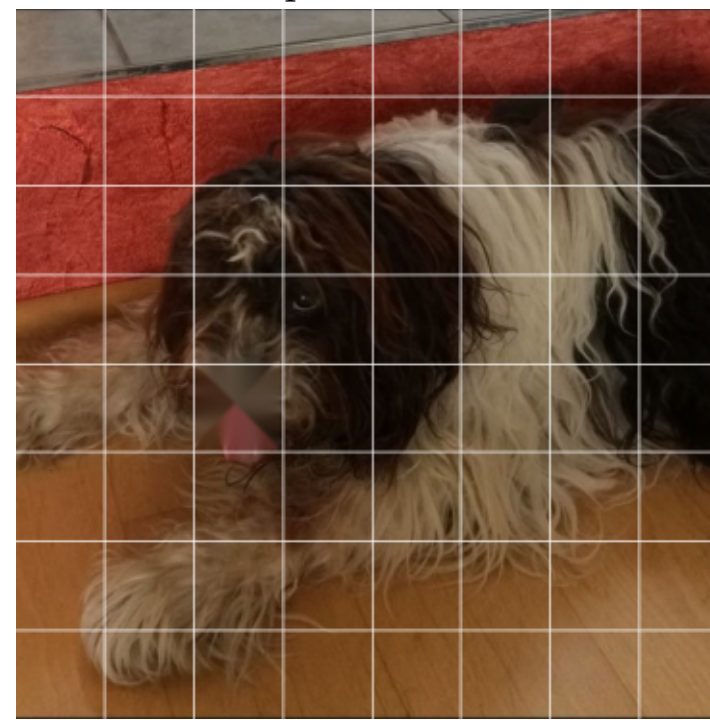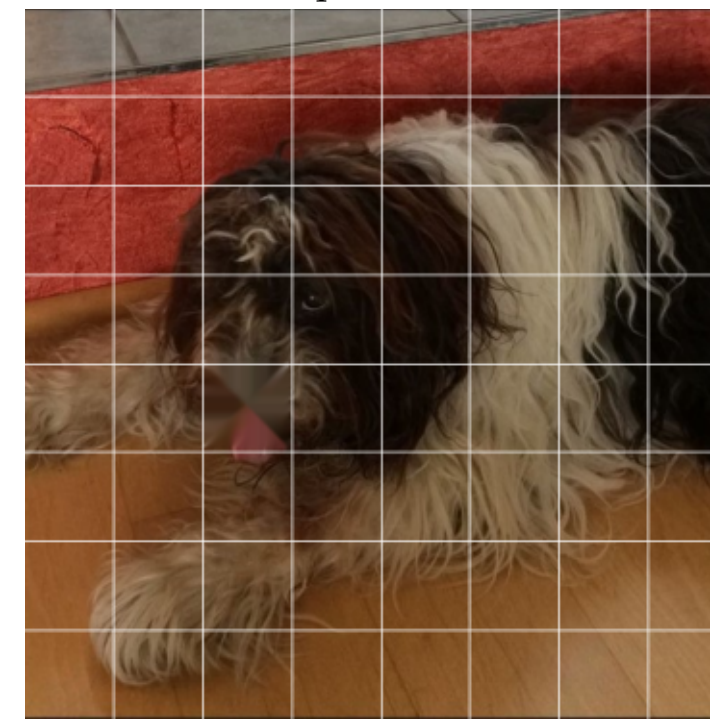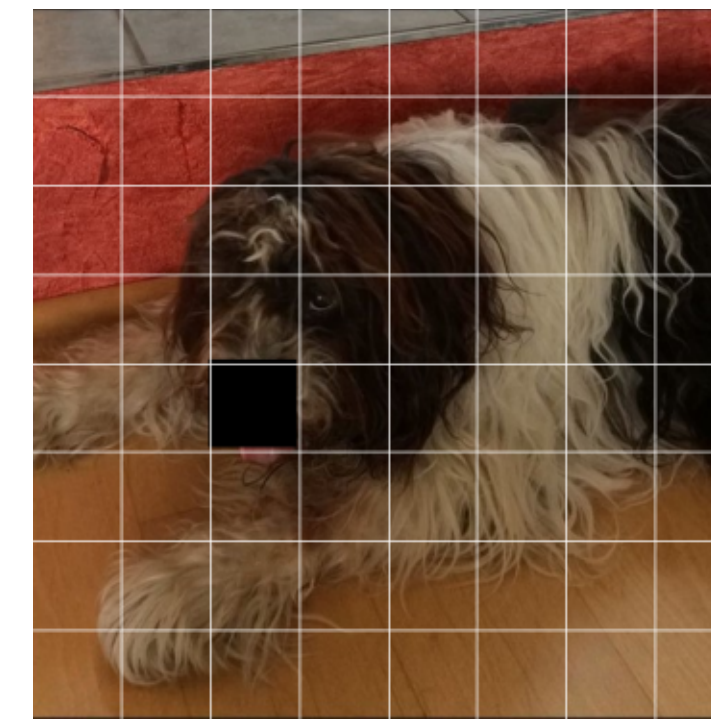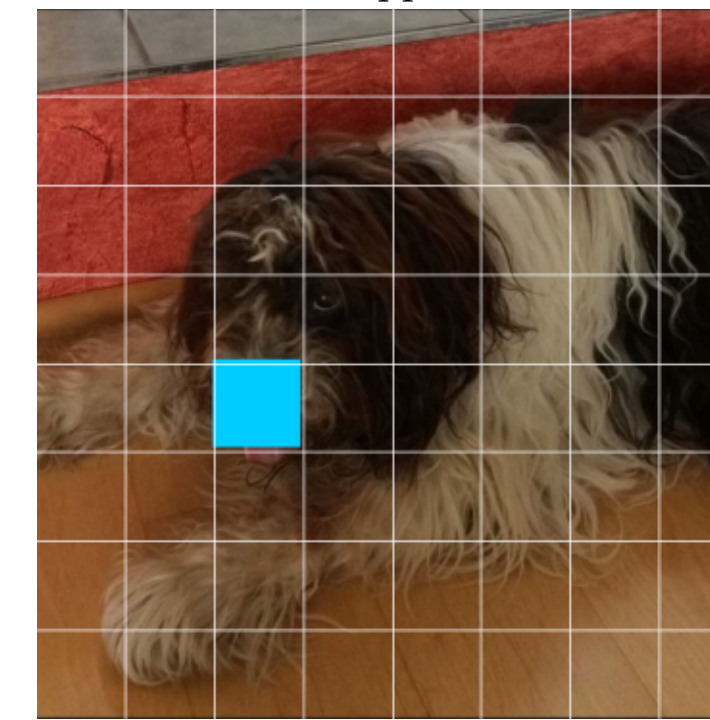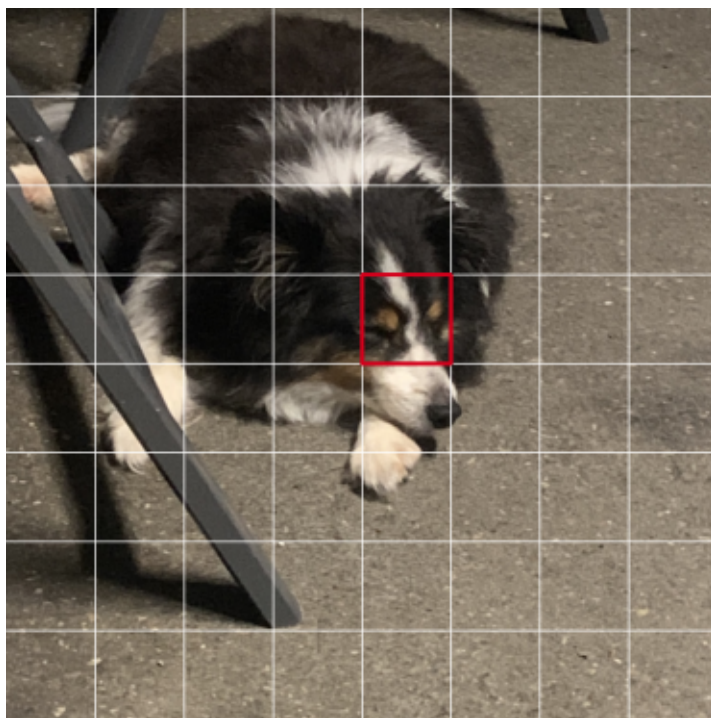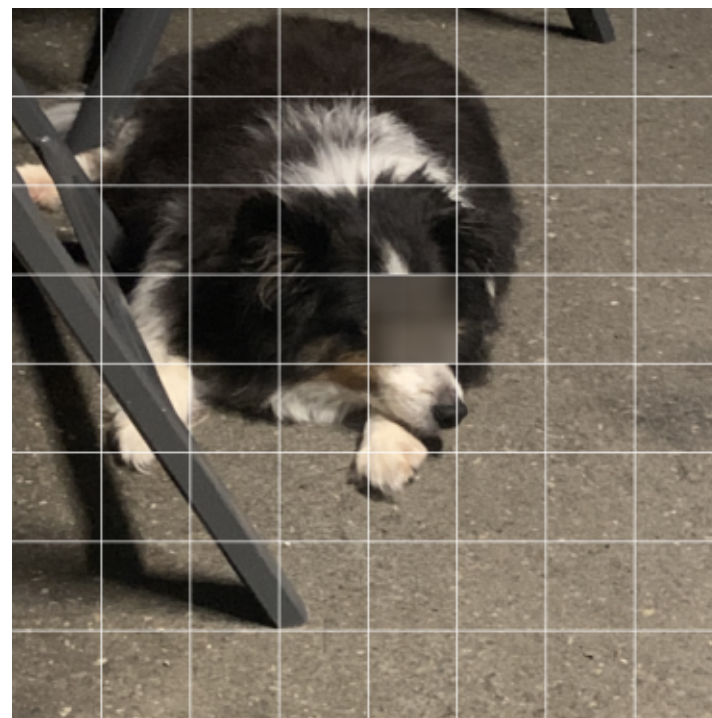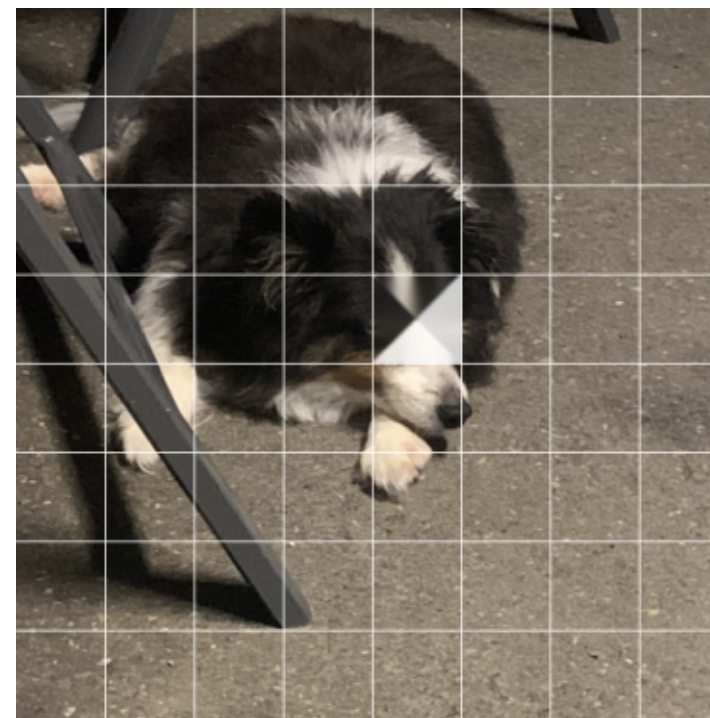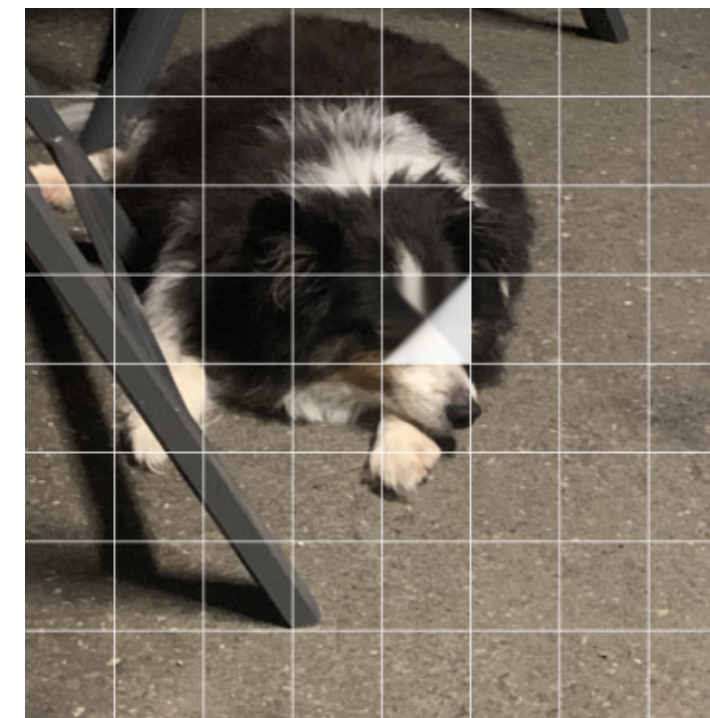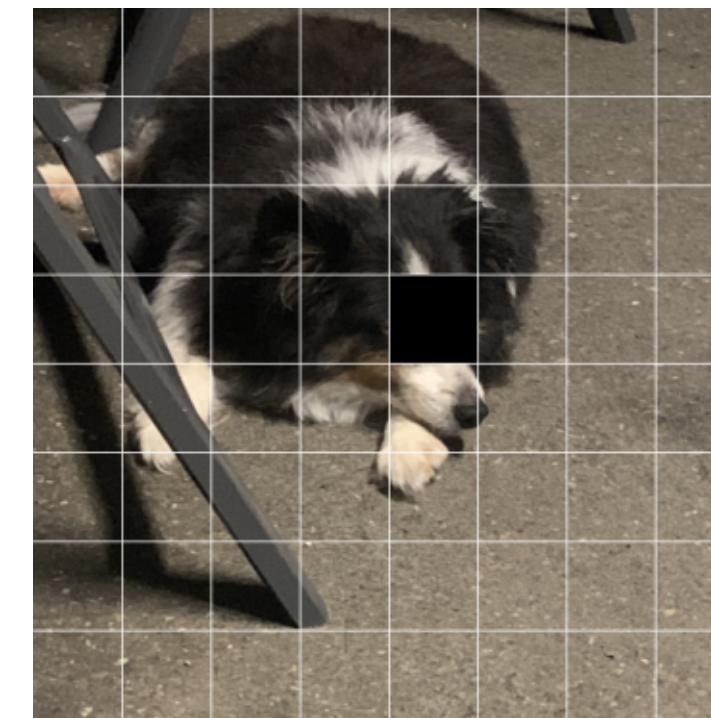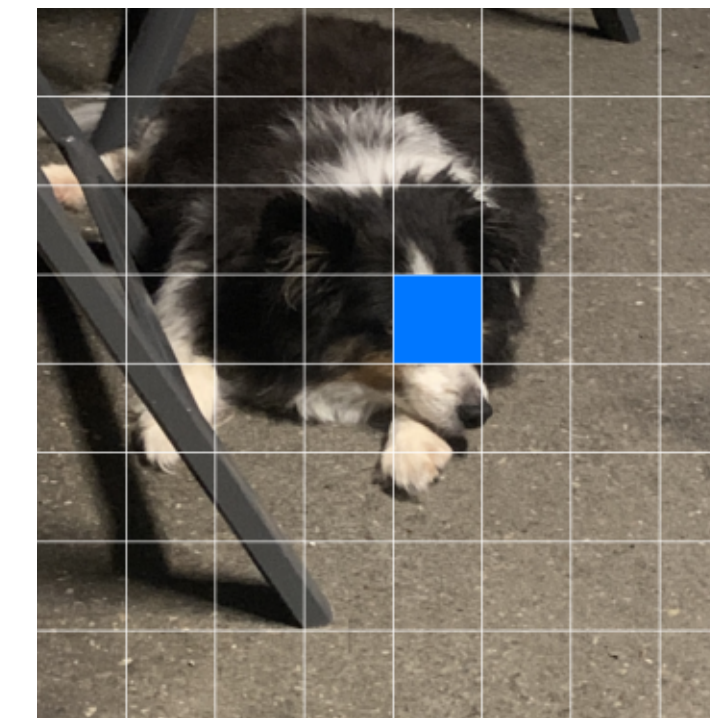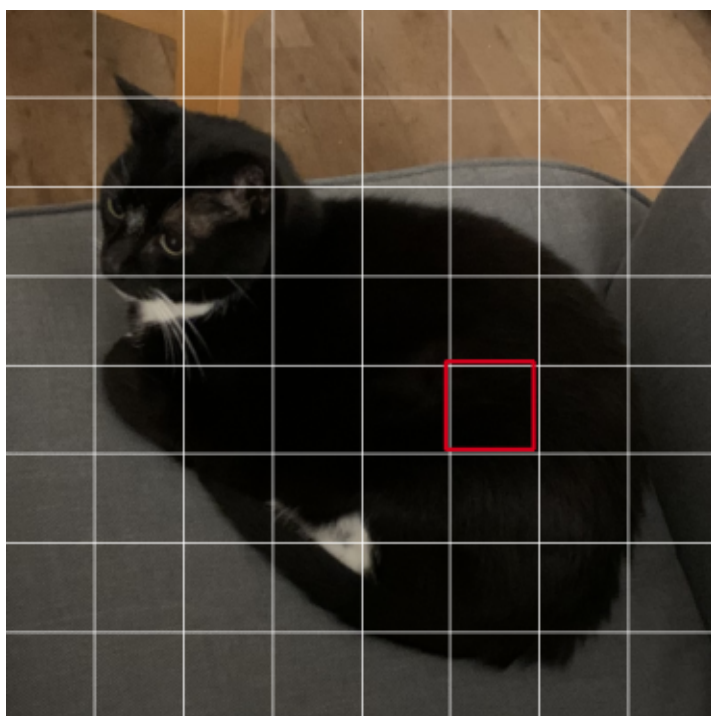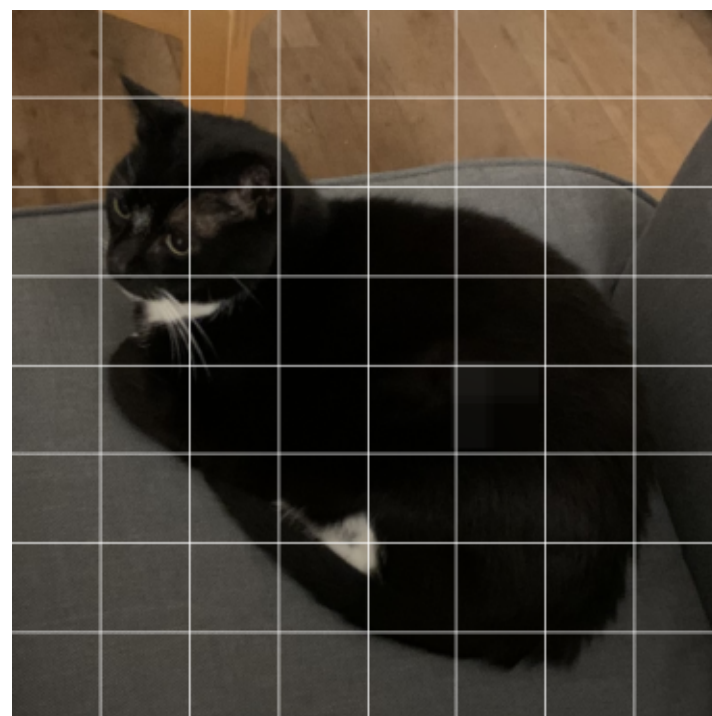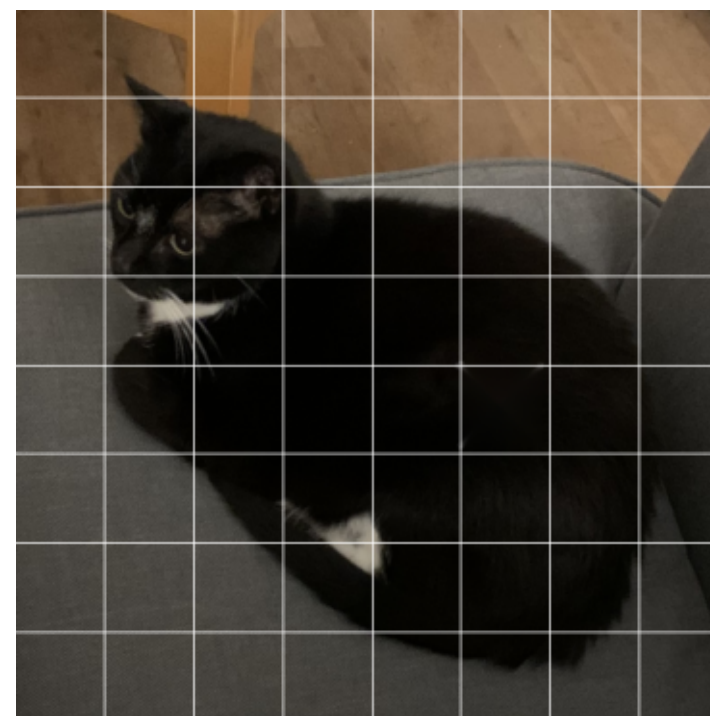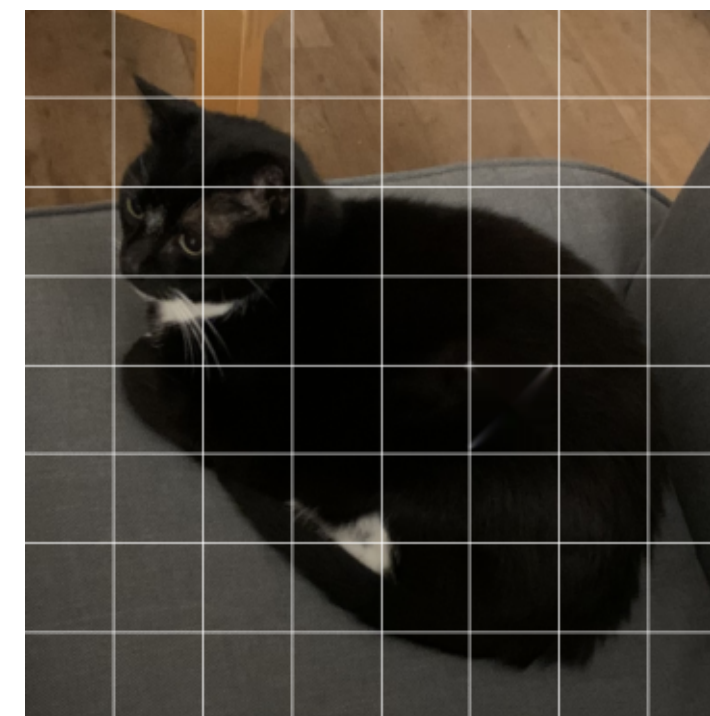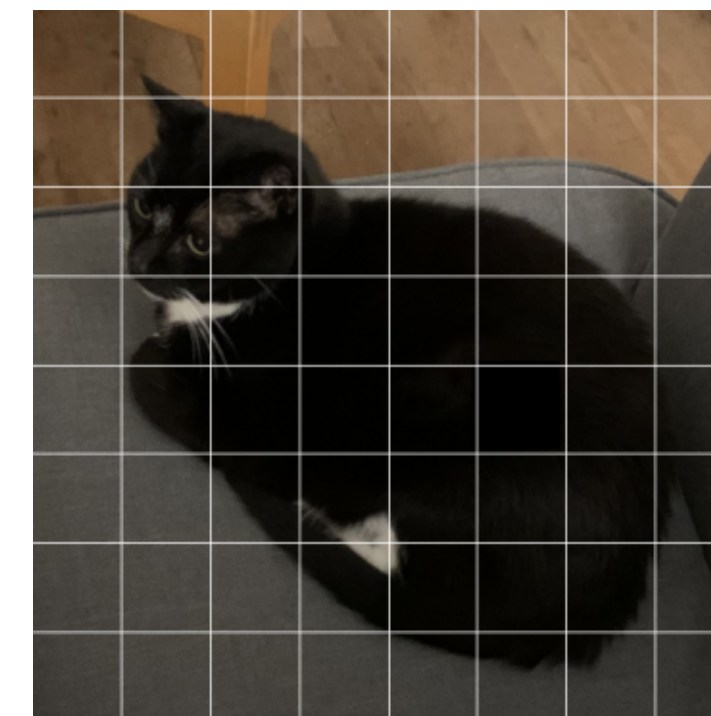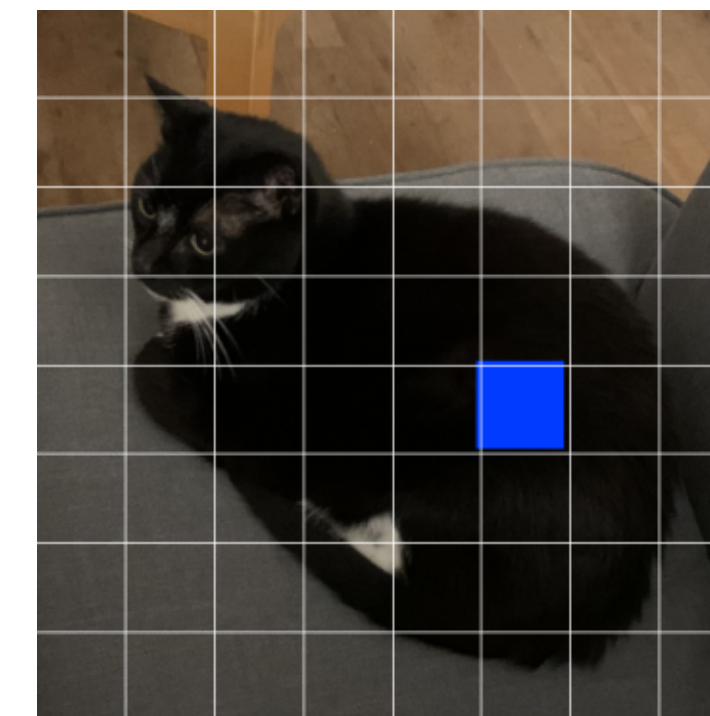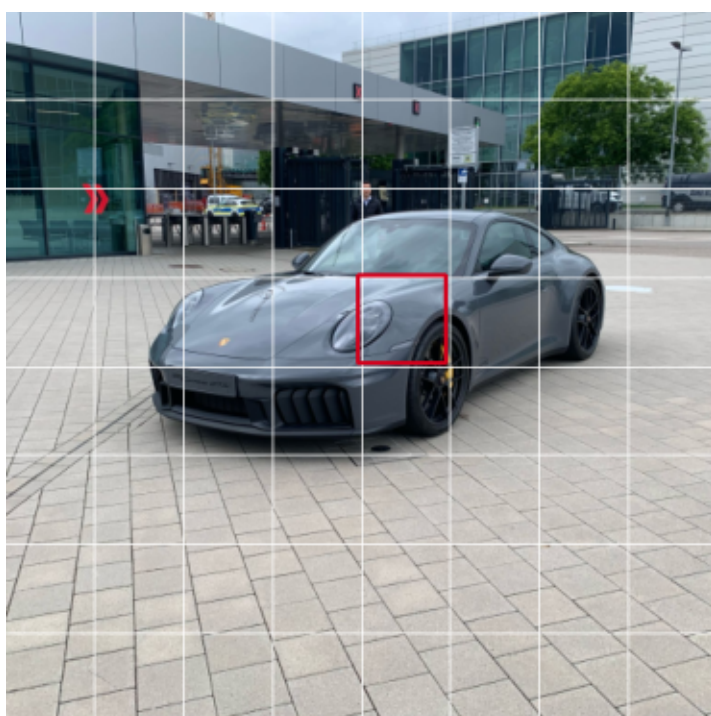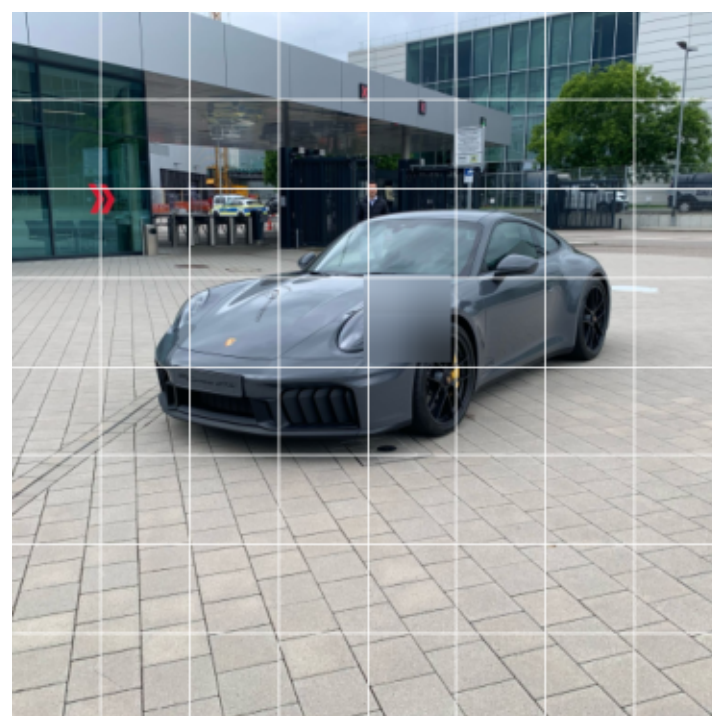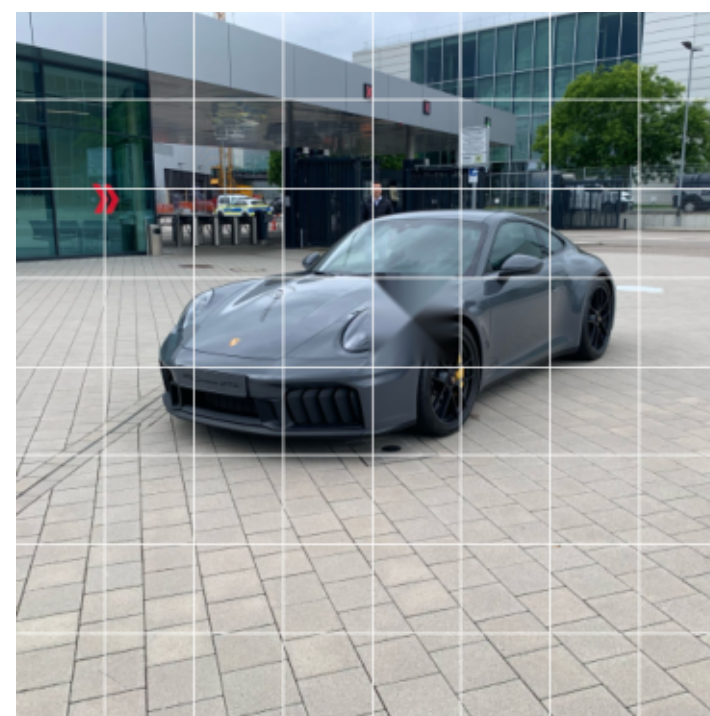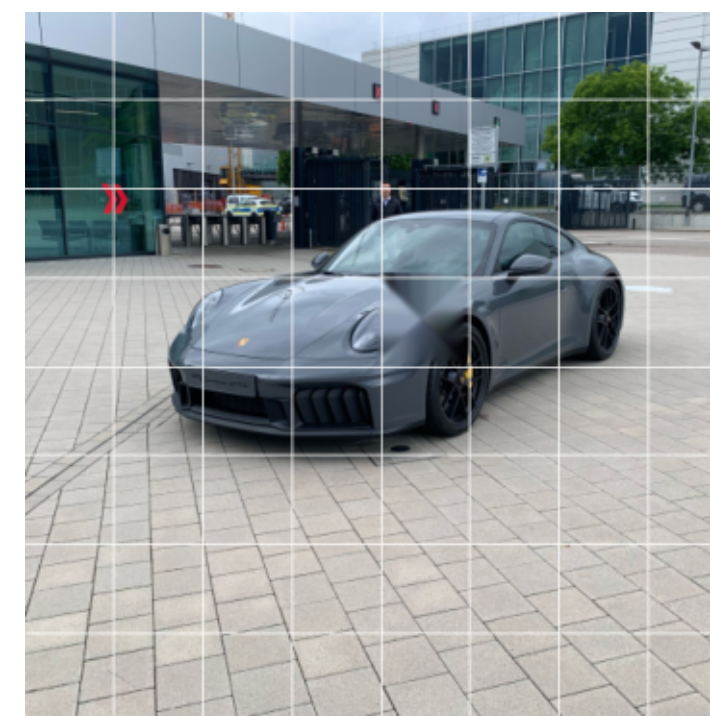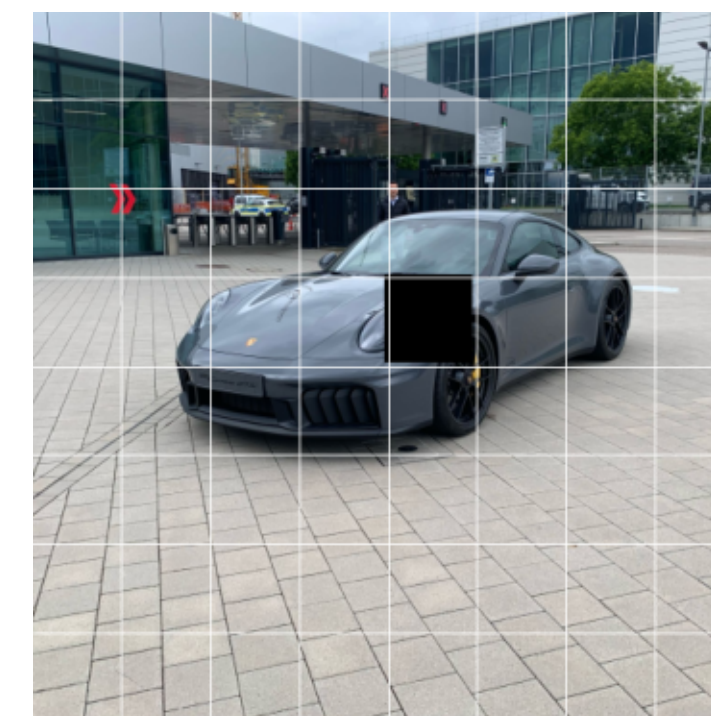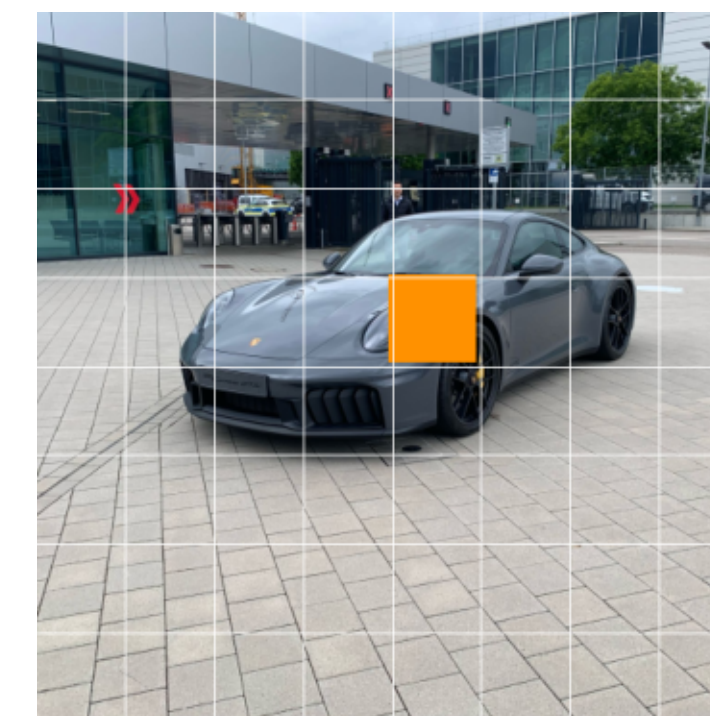

Supplement: supplementary_material [file hsv_perturbation_results.pdf › supplementary_material/figs/results/hsv_perturbation_results.pdf]

Blurring

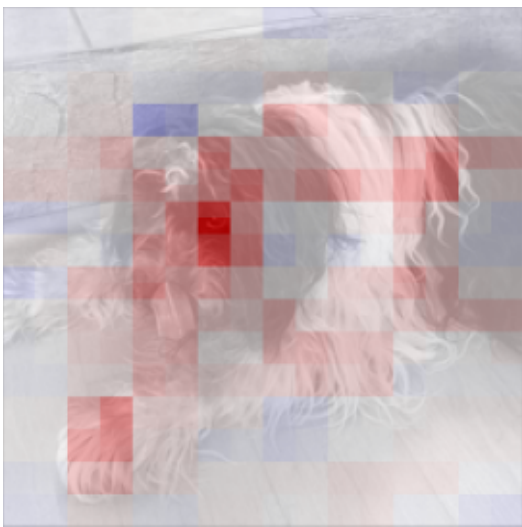

Inpaint Telea

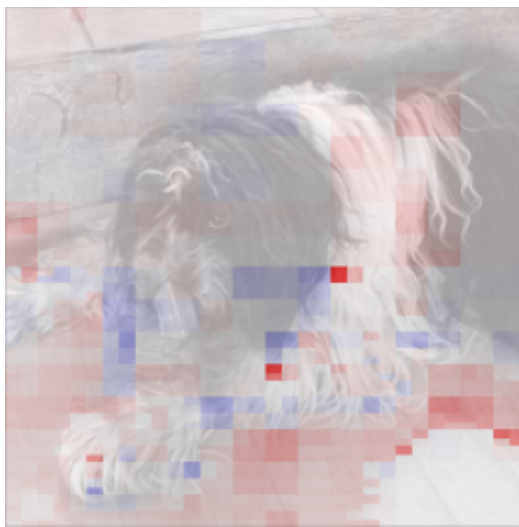

Inpaint NS

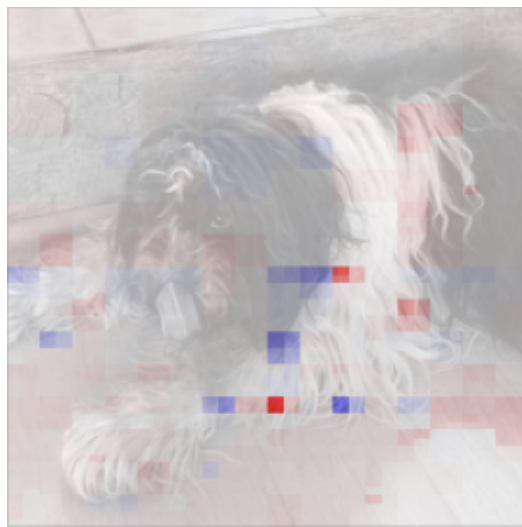

UDP Black

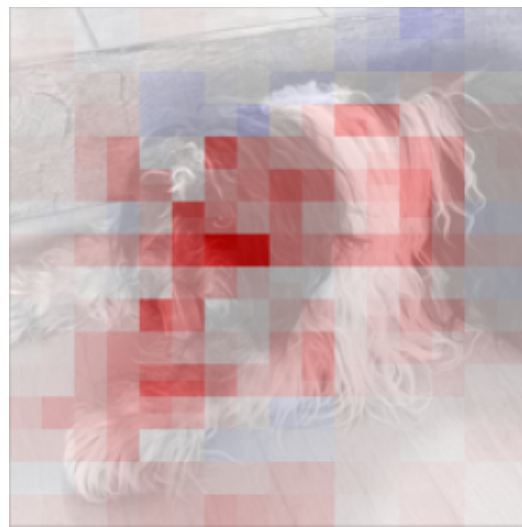

UDP White

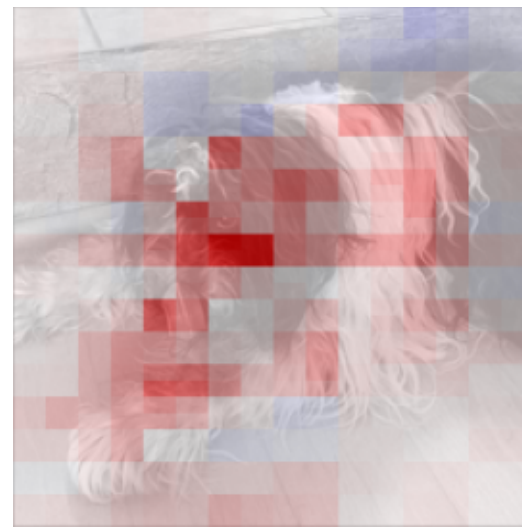

MDP

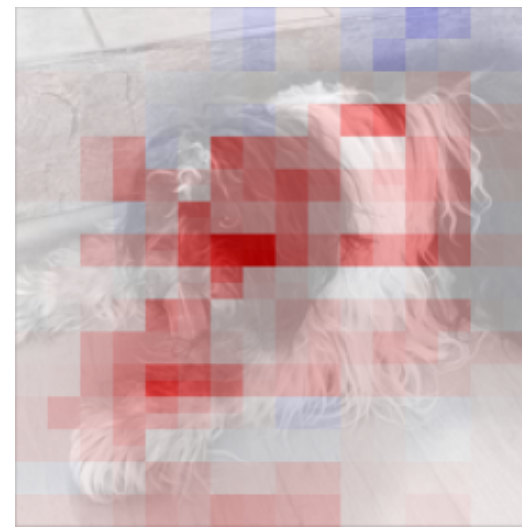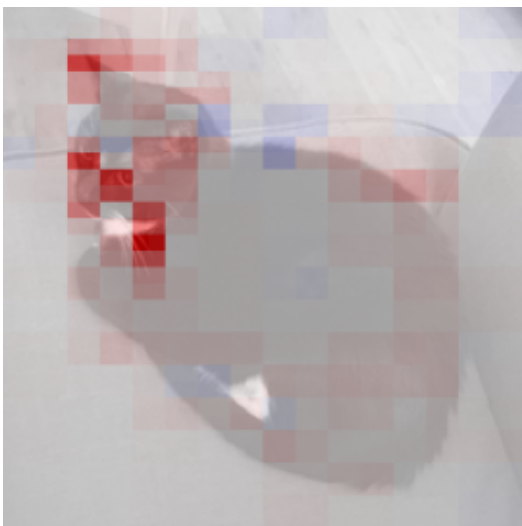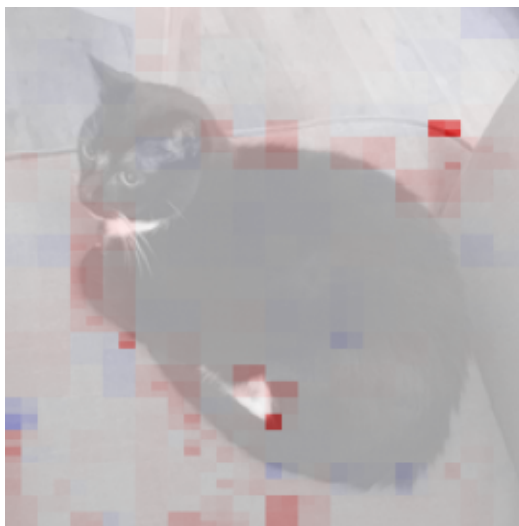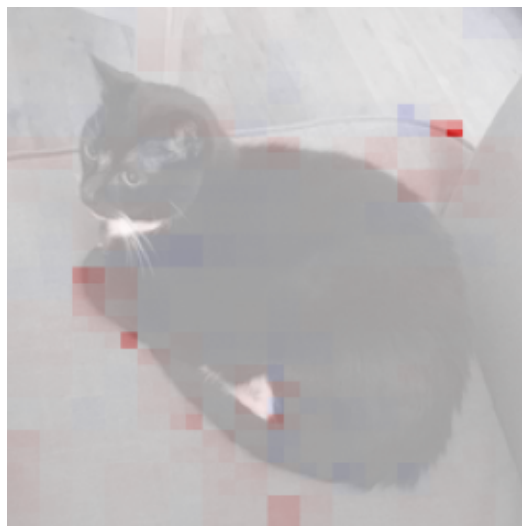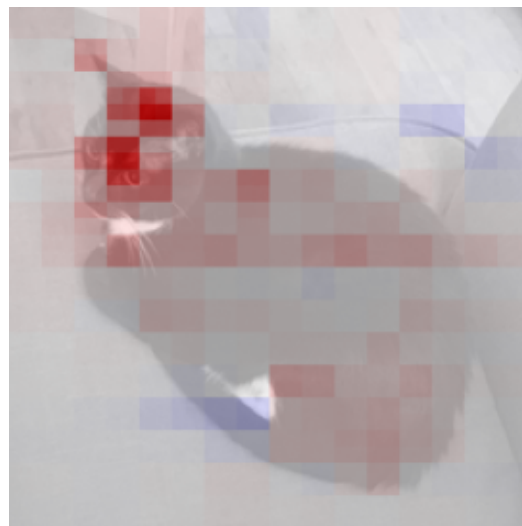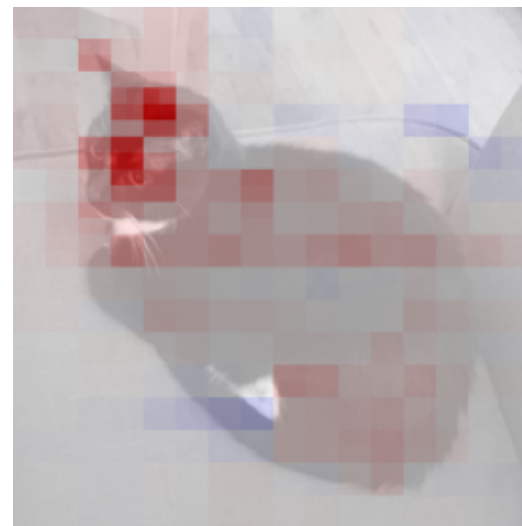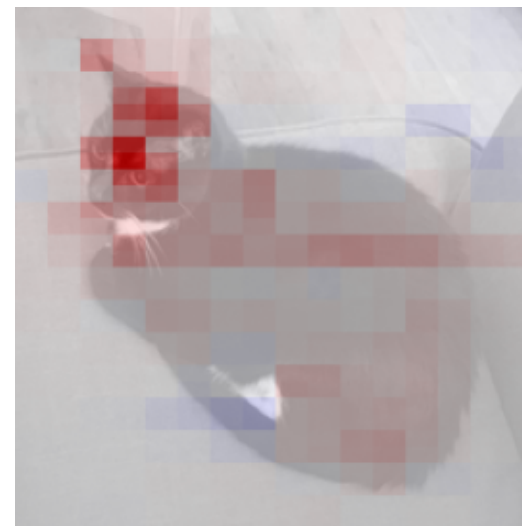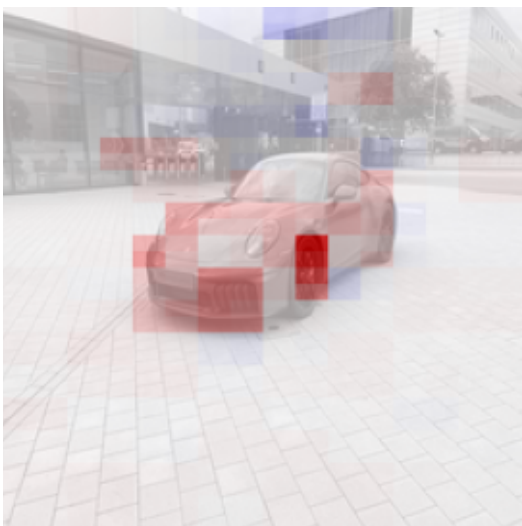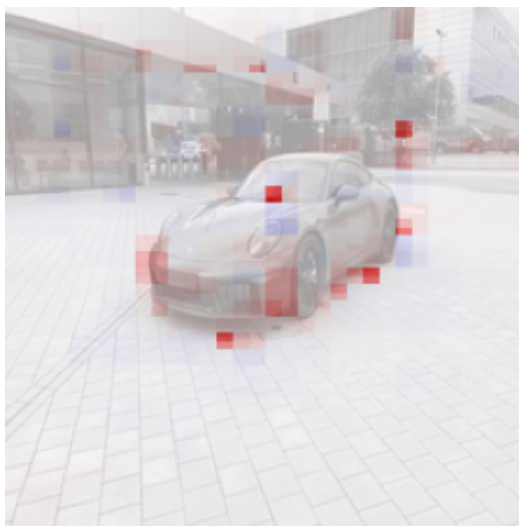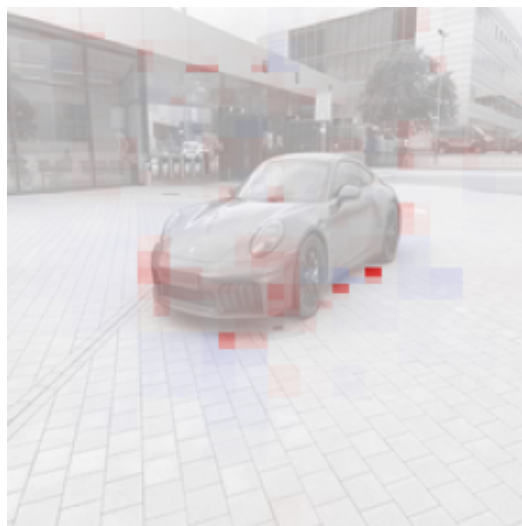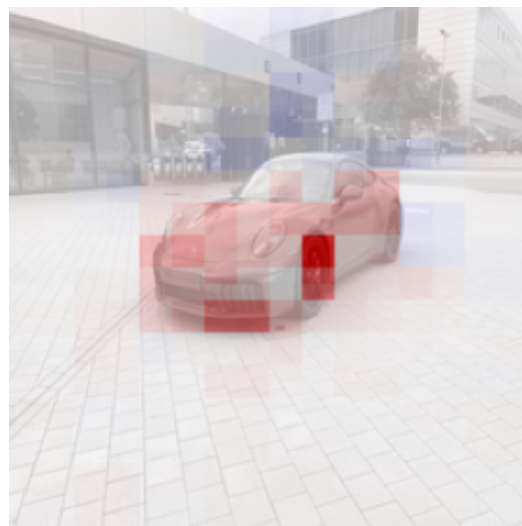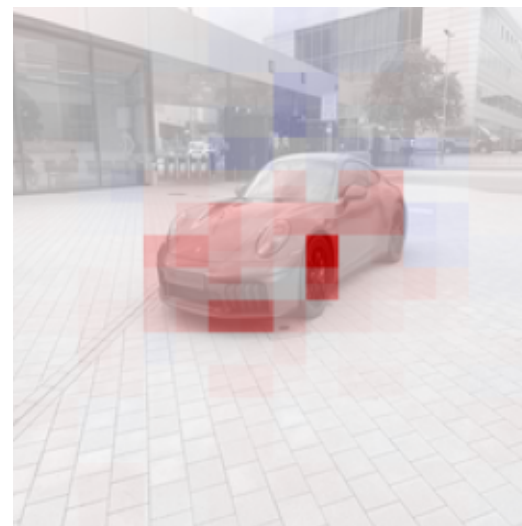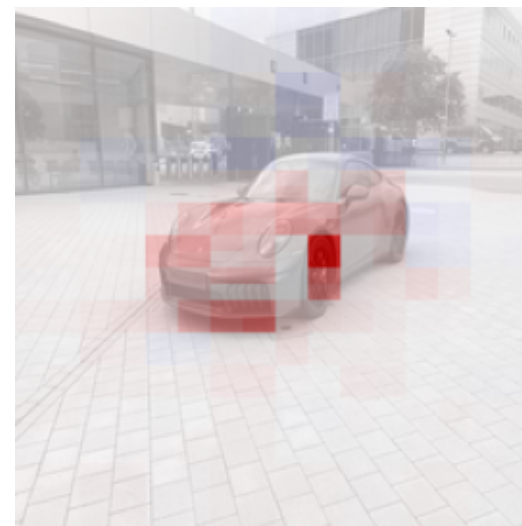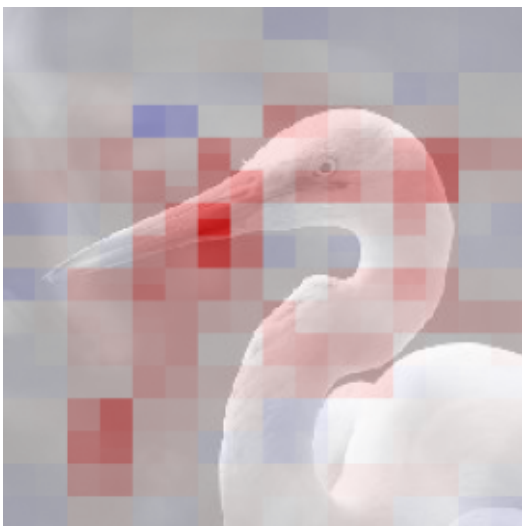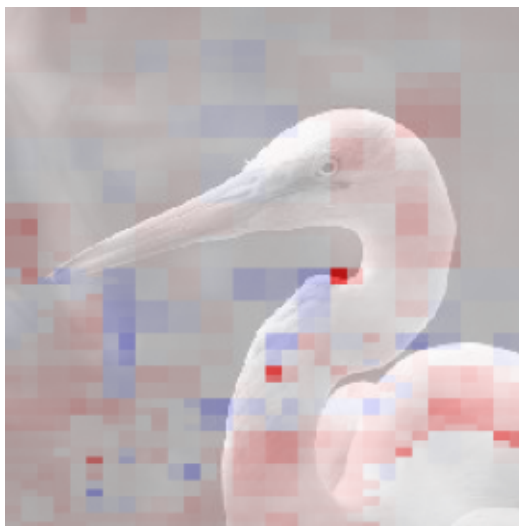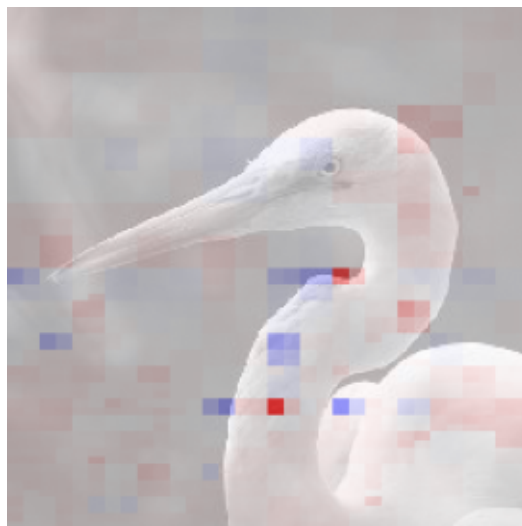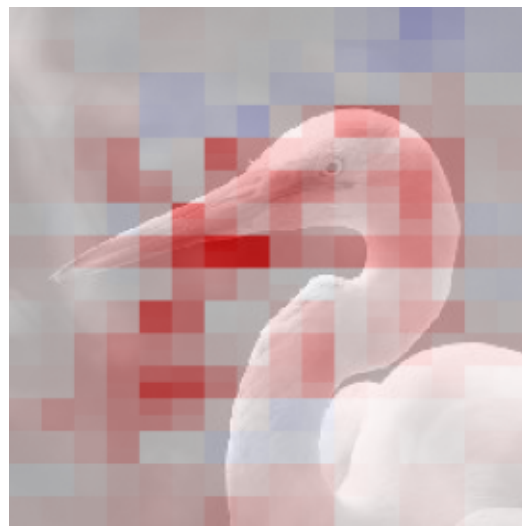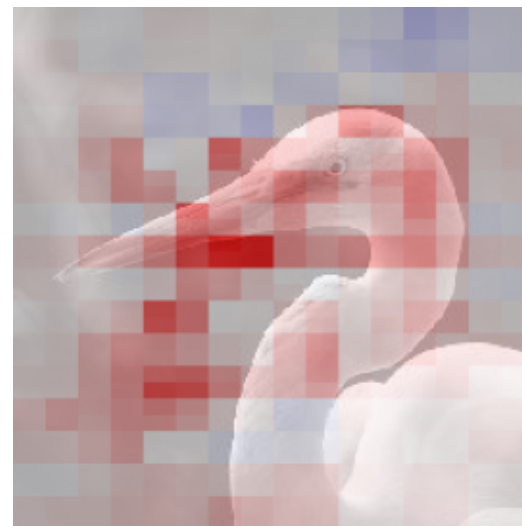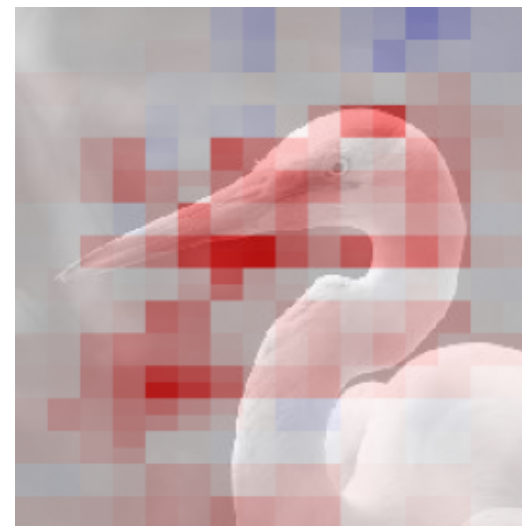

Supplement: supplementary_material [file mobilnet.pdf › supplementary_material/figs/results/mobilnet.pdf]

Blurring

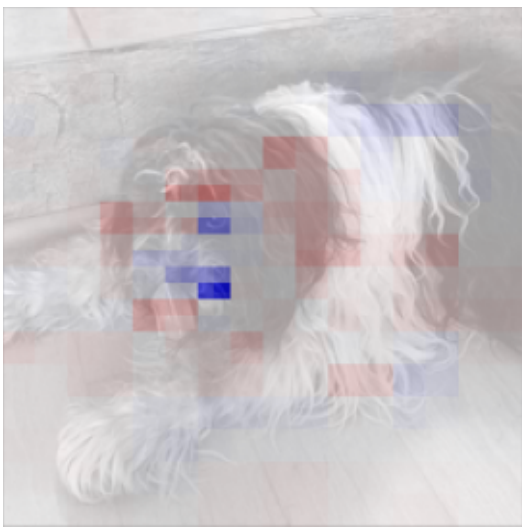

Inpaint Telea

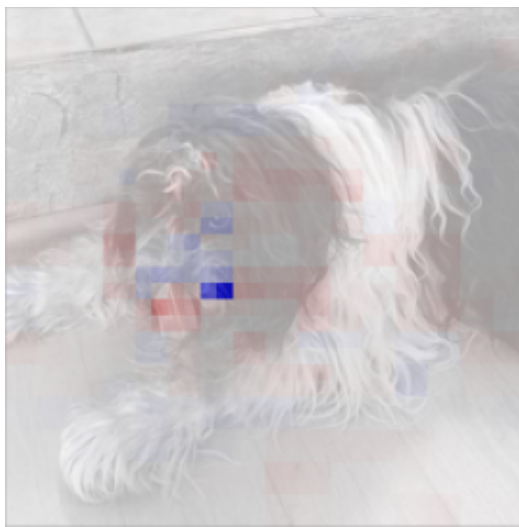

Inpaint NS

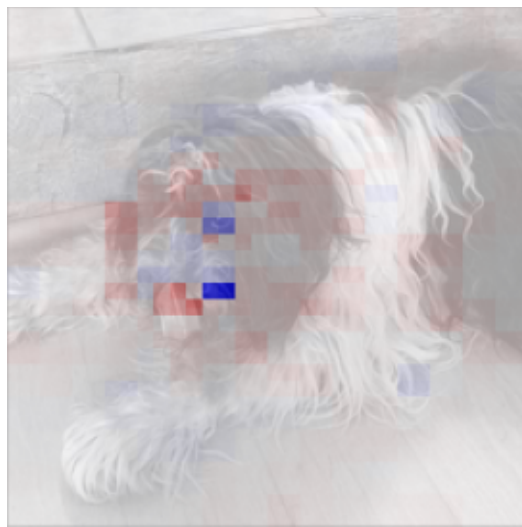

UDP Black

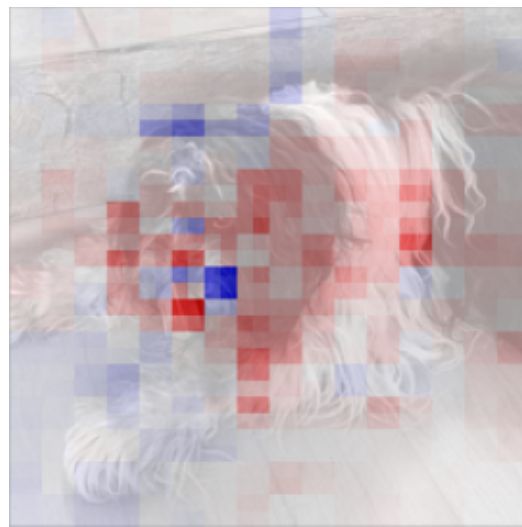

UDP White

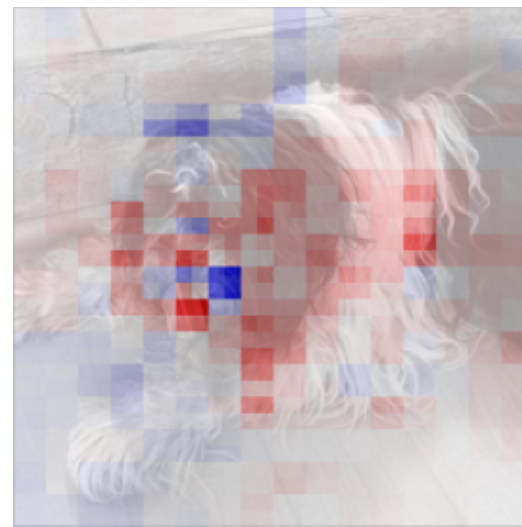

MDP

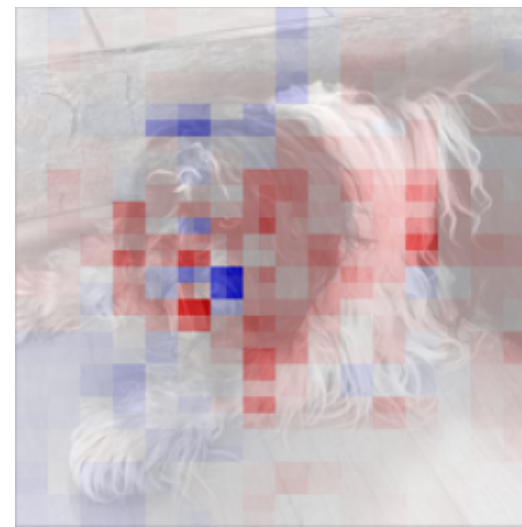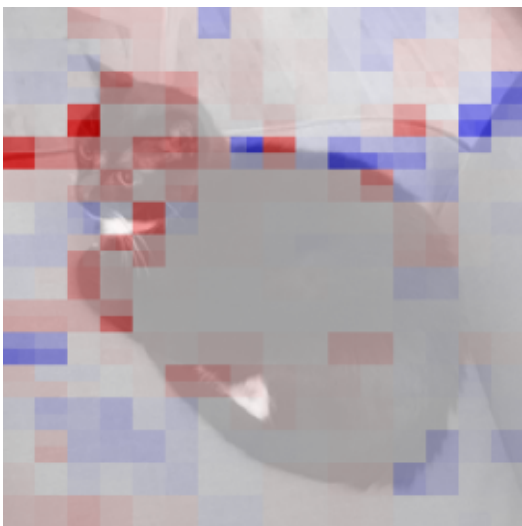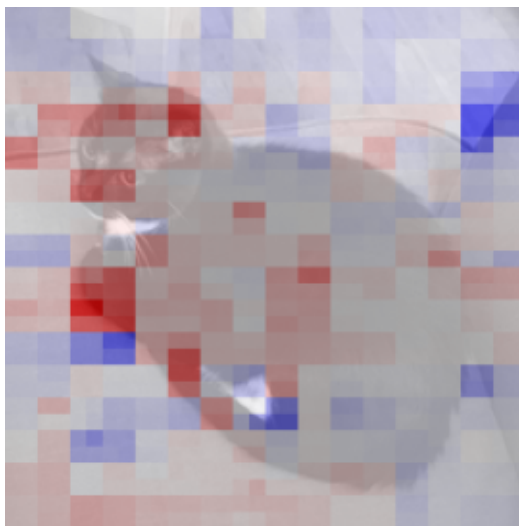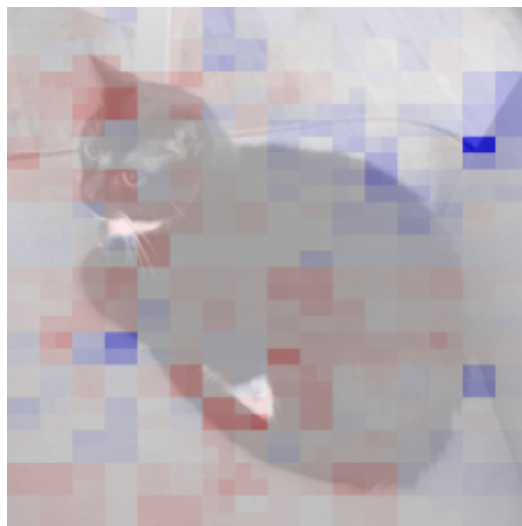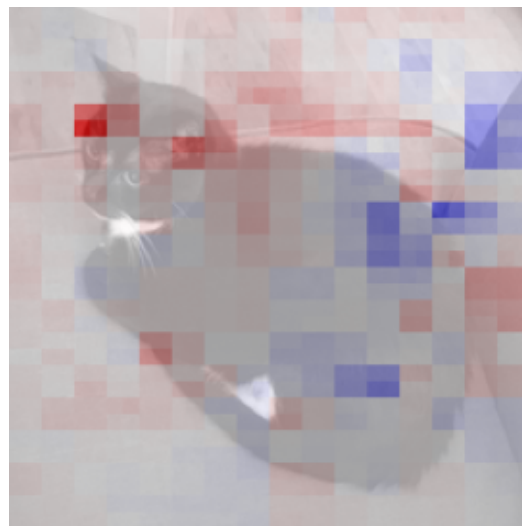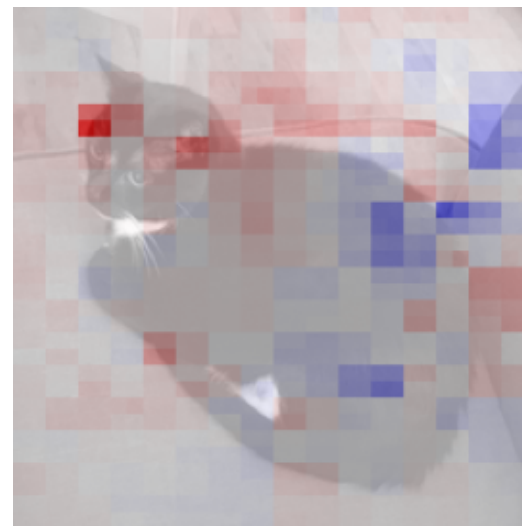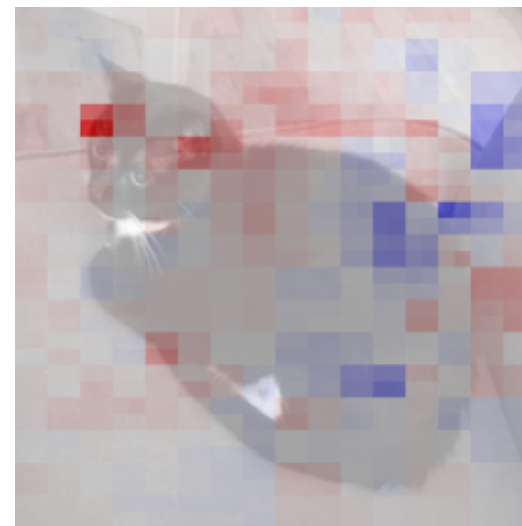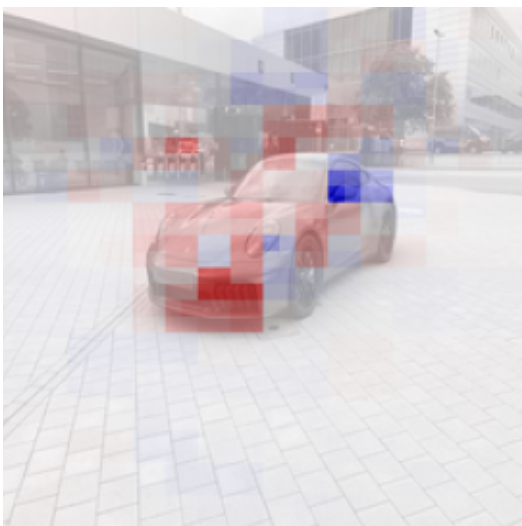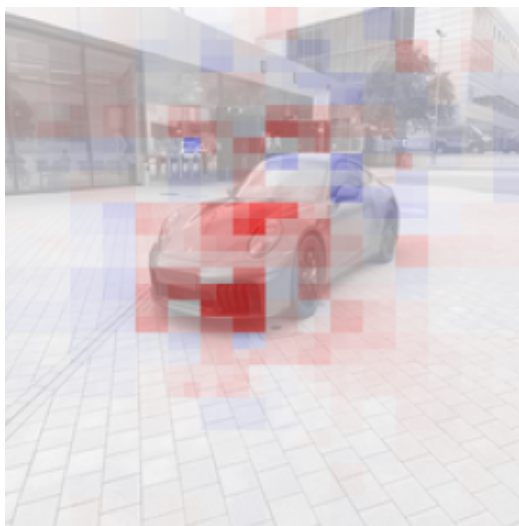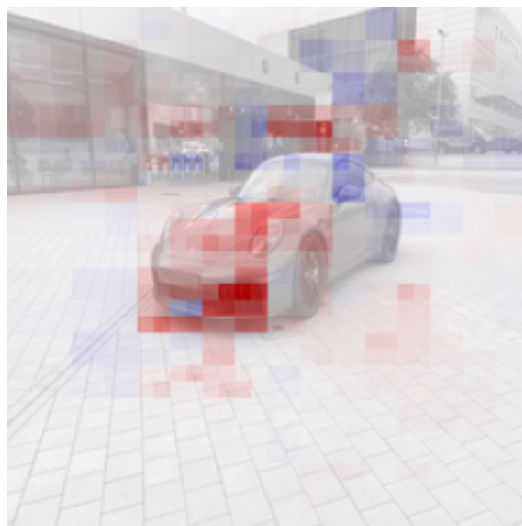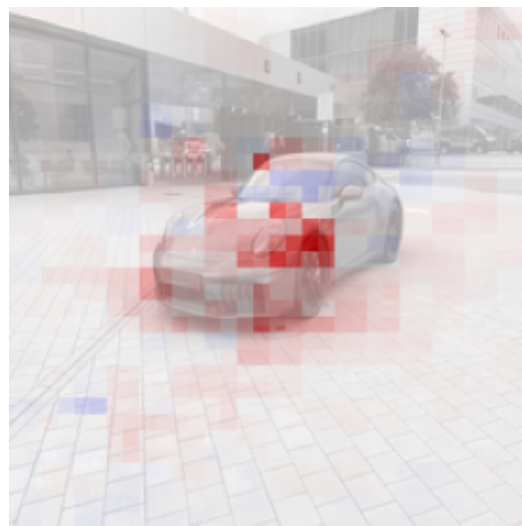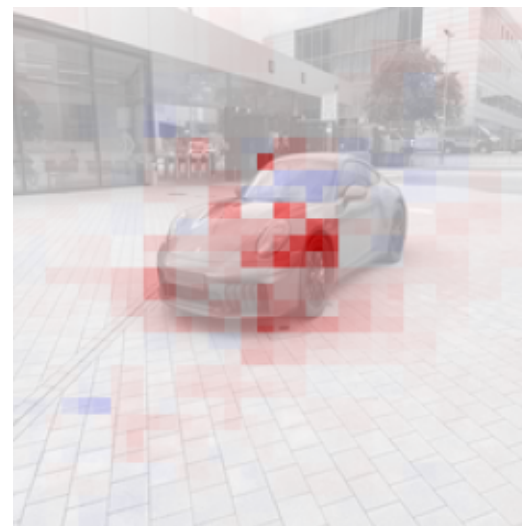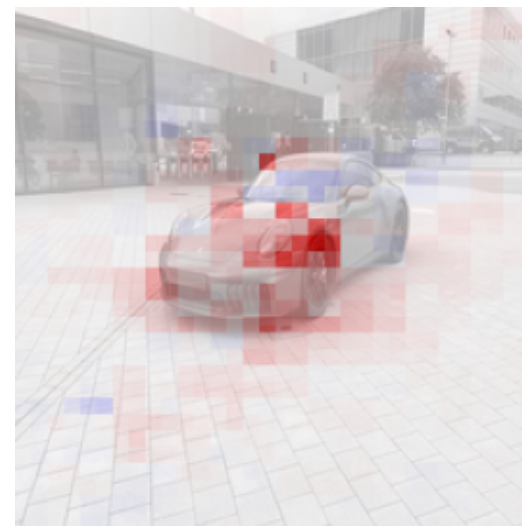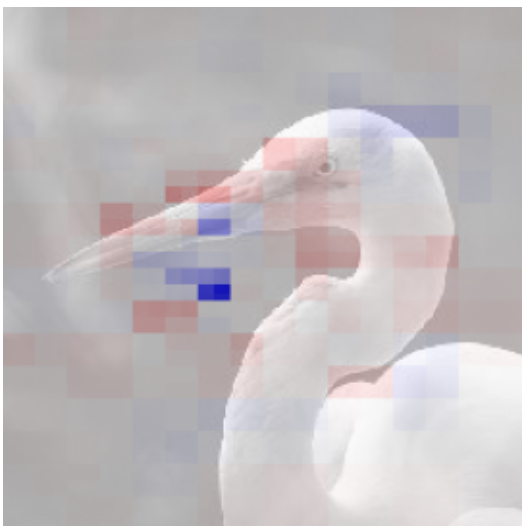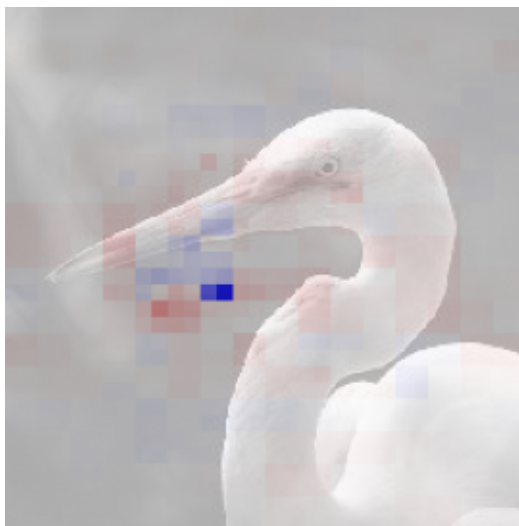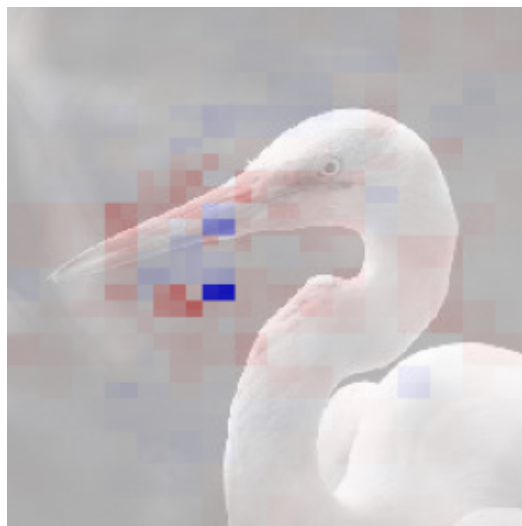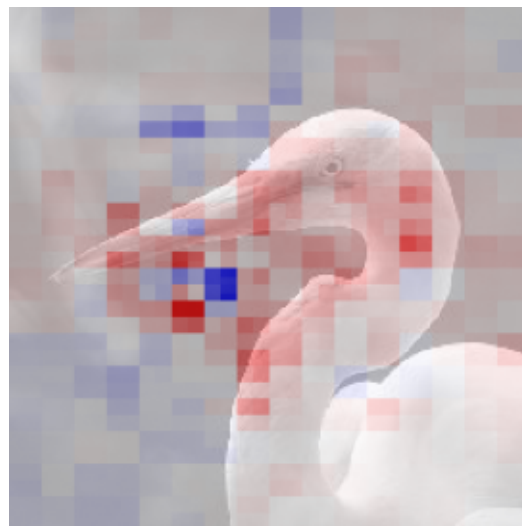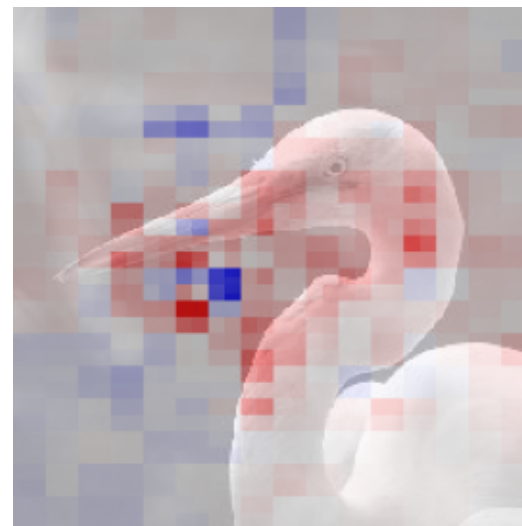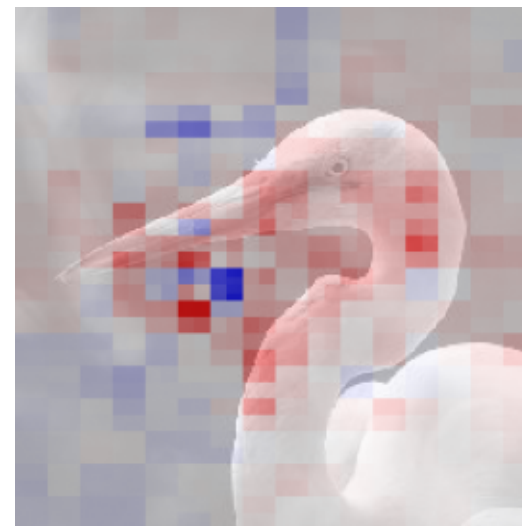

Supplement: supplementary_material [file resnet.pdf › supplementary_material/figs/results/resnet.pdf]

Original

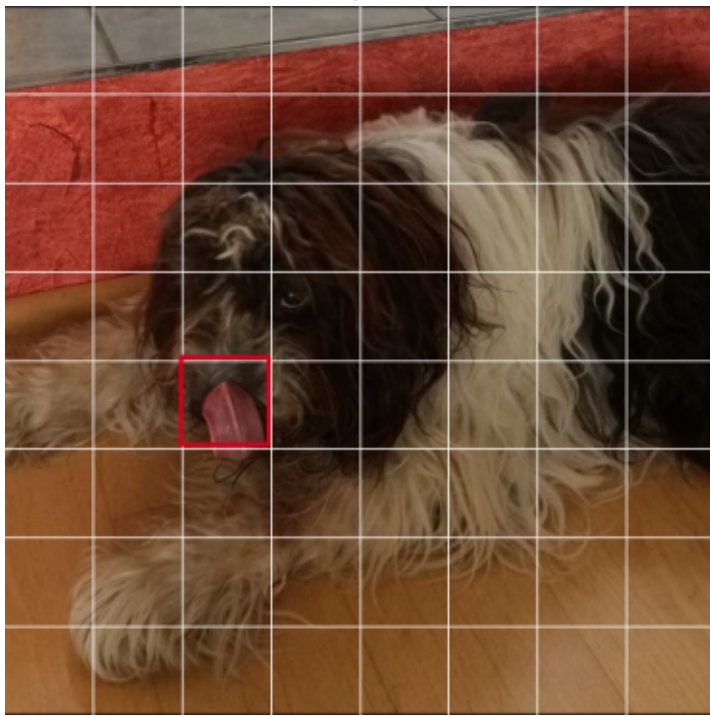

Blurring

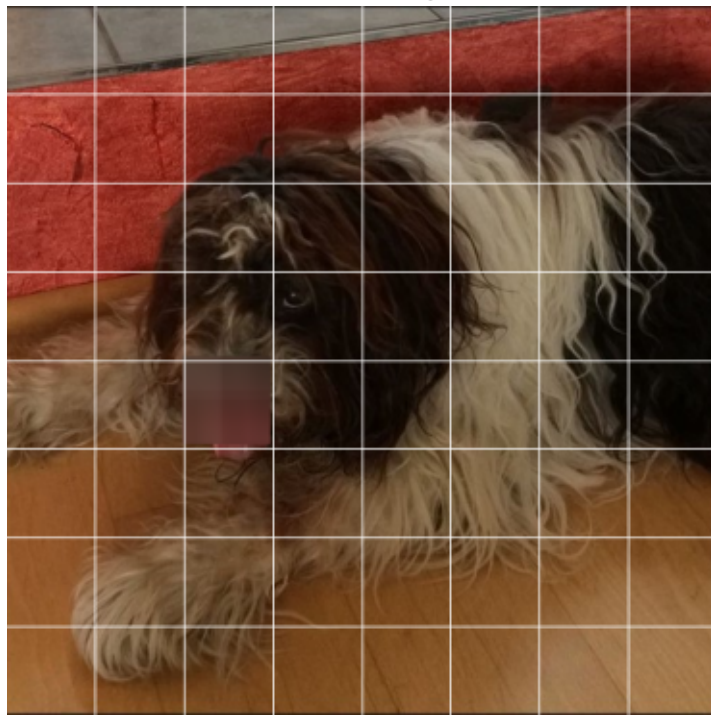

Inpaint Telea

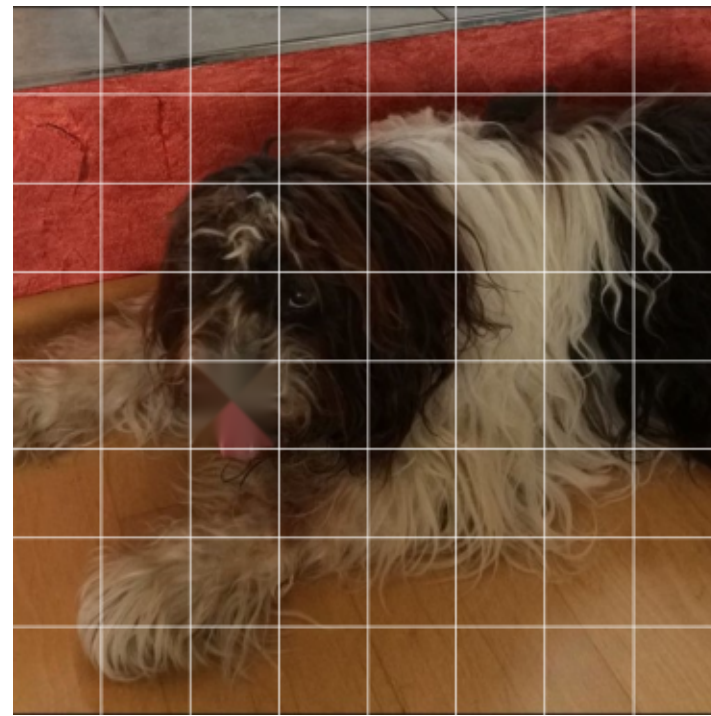

Inpaint NS

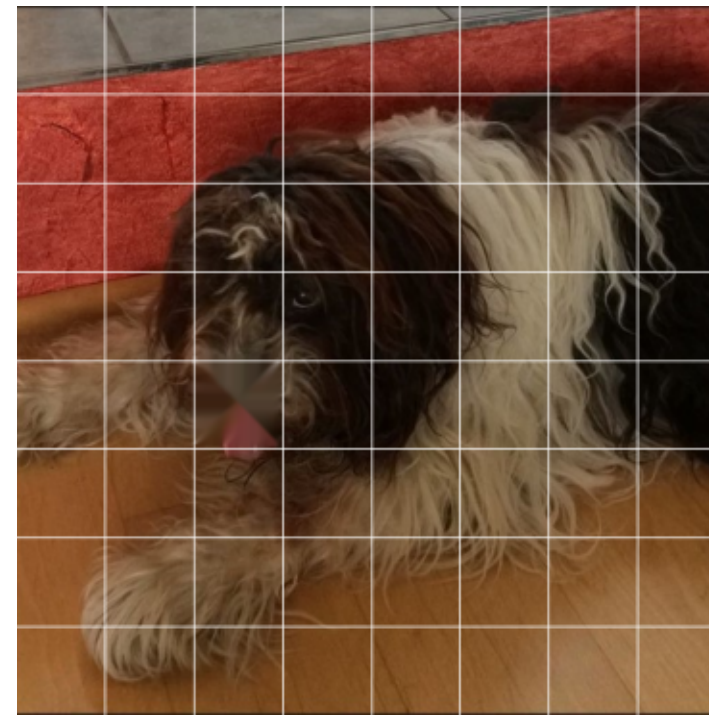

UCR - Black

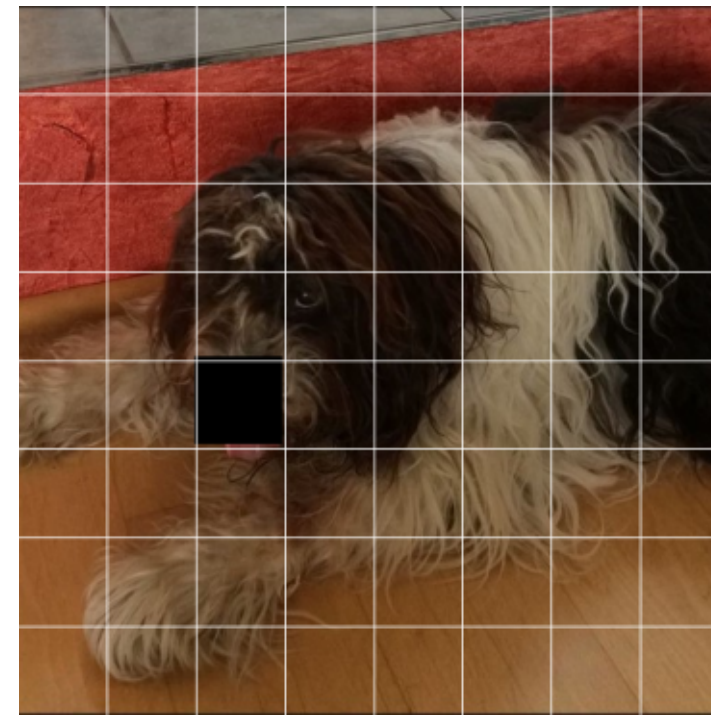

Our Approach

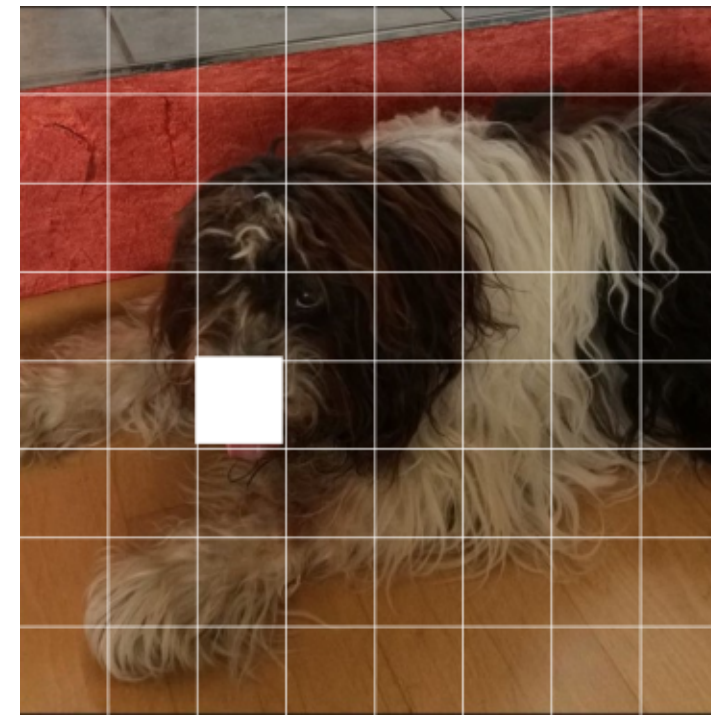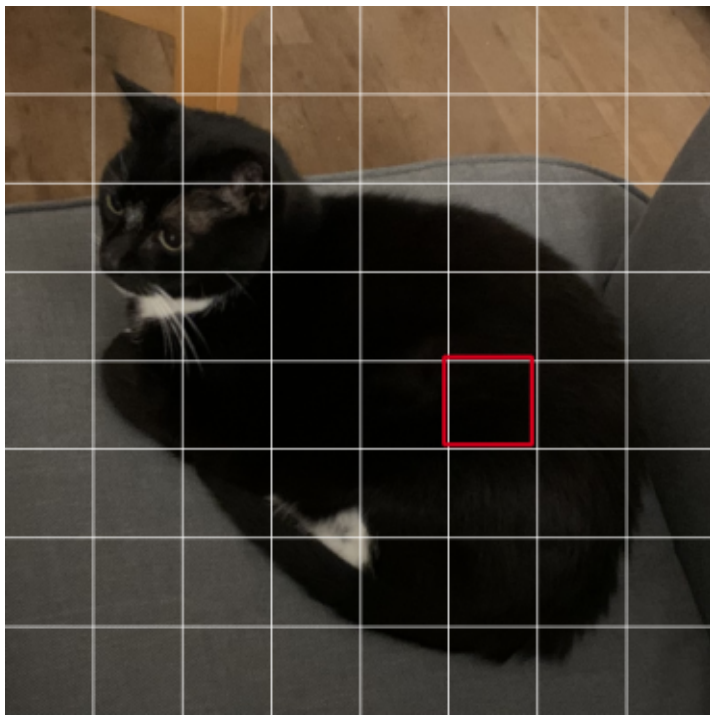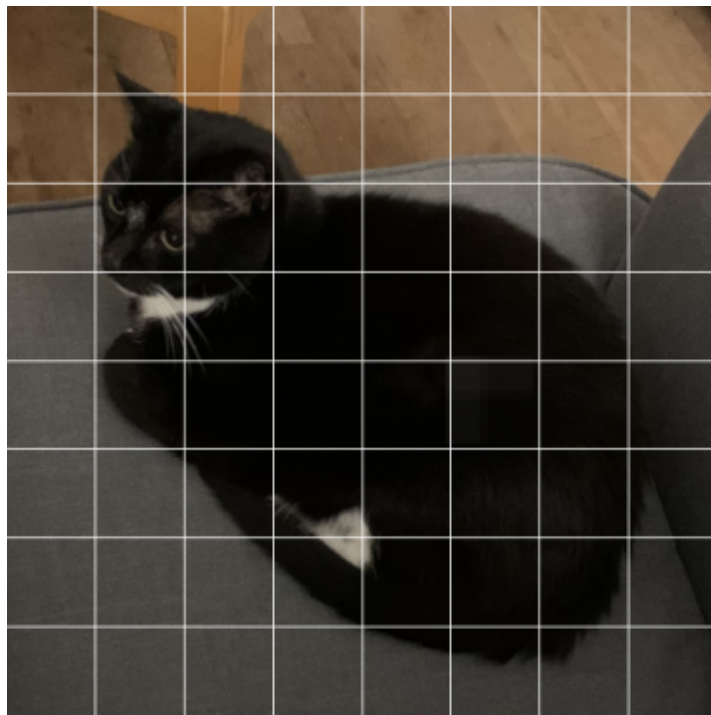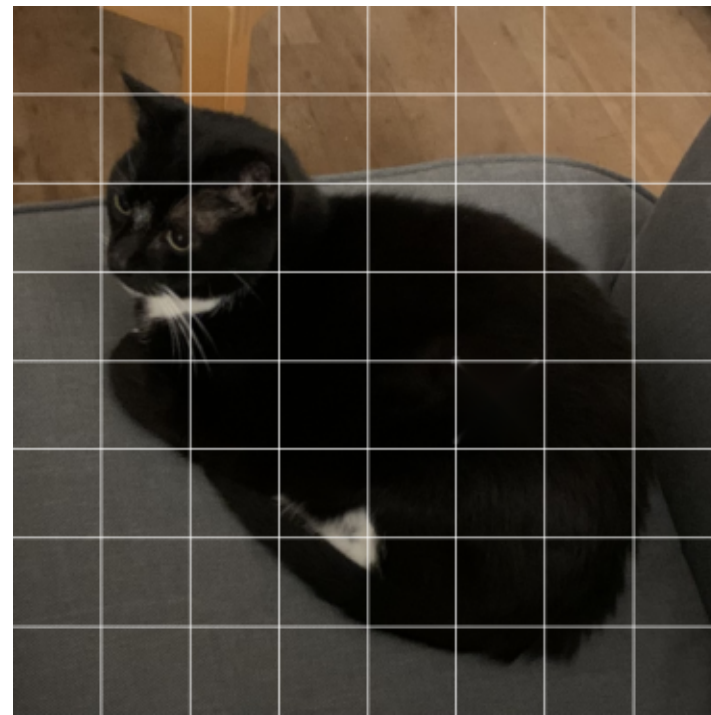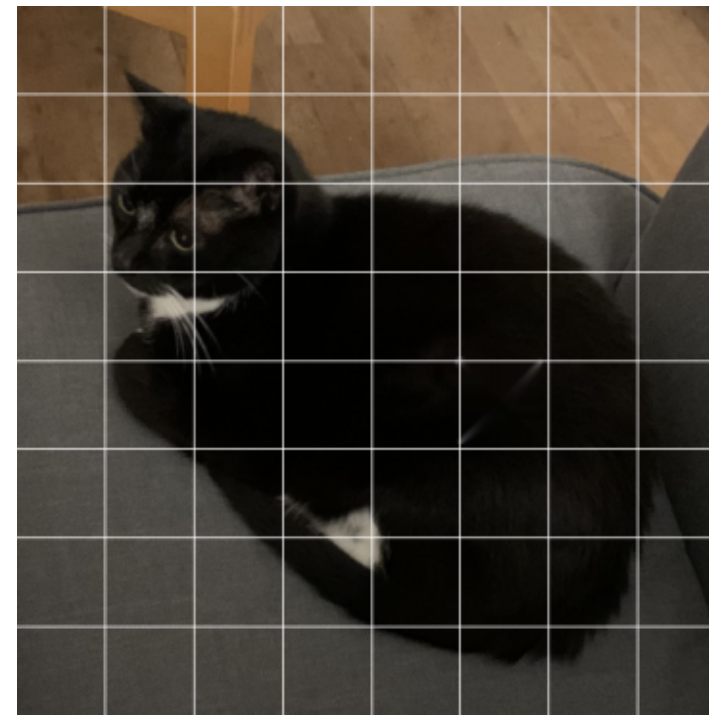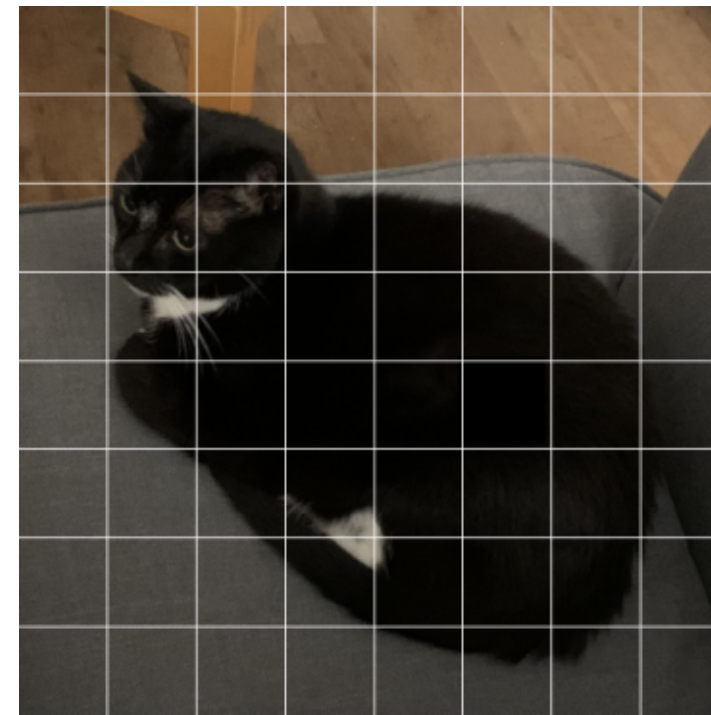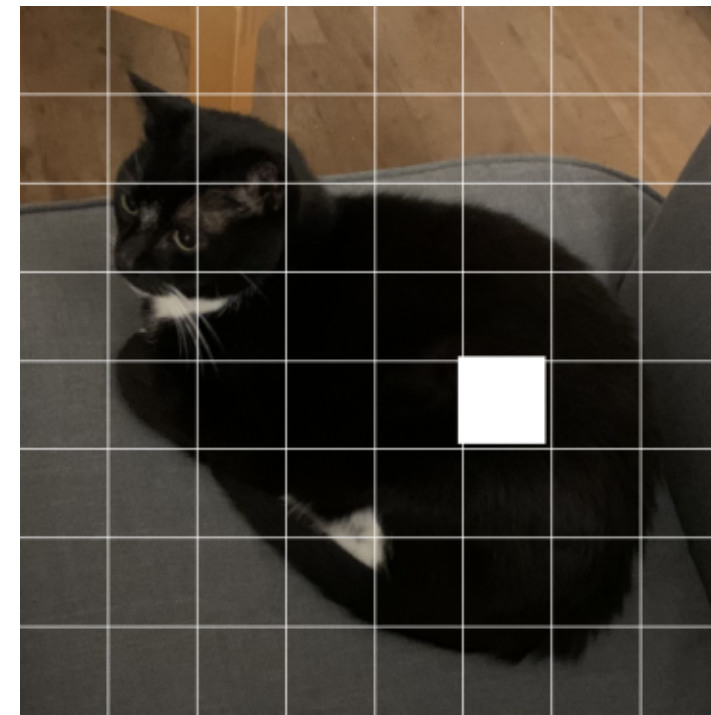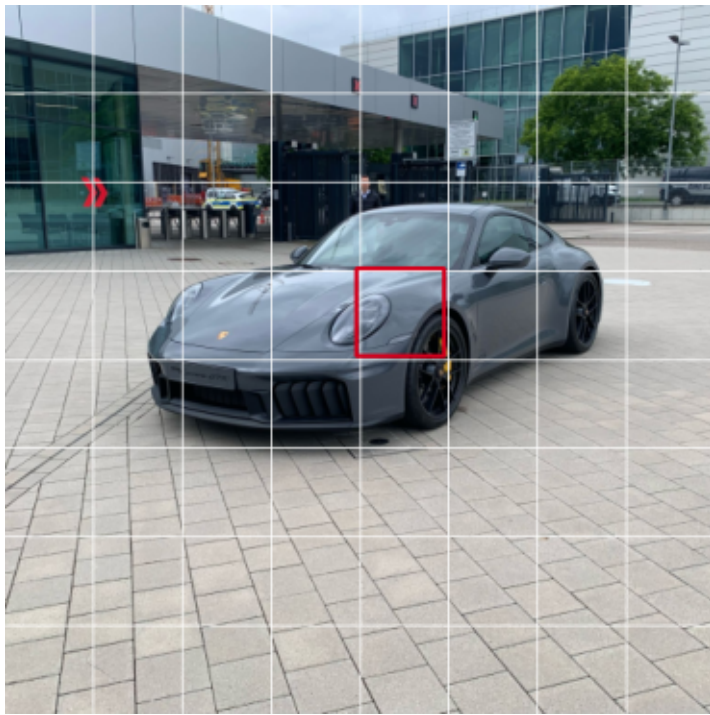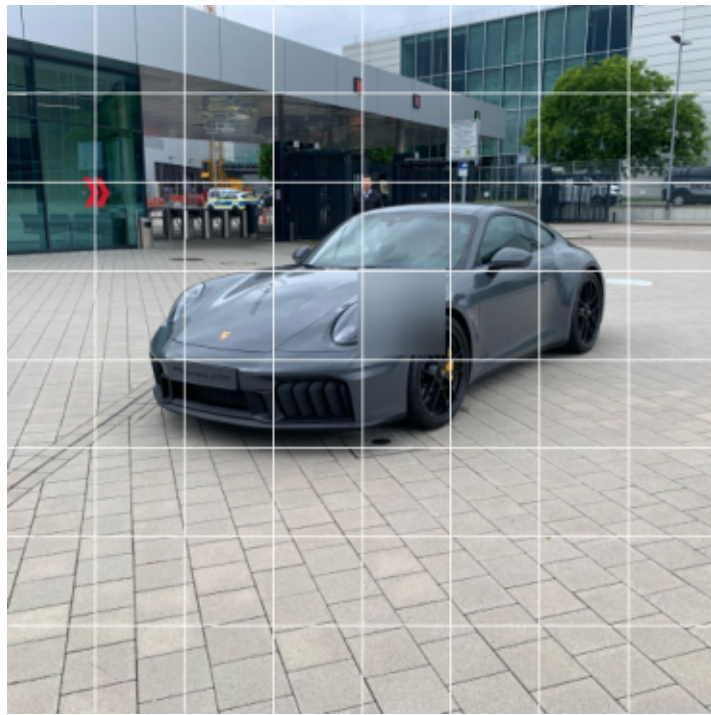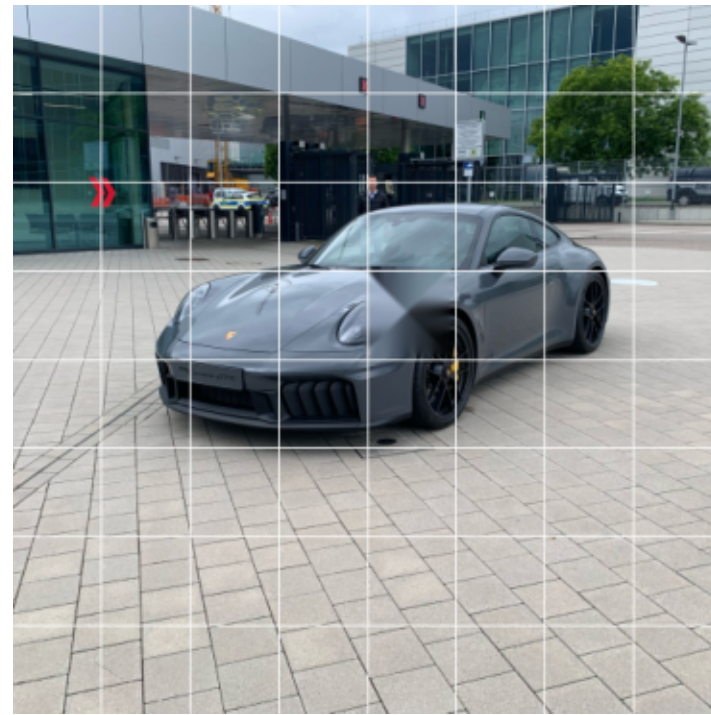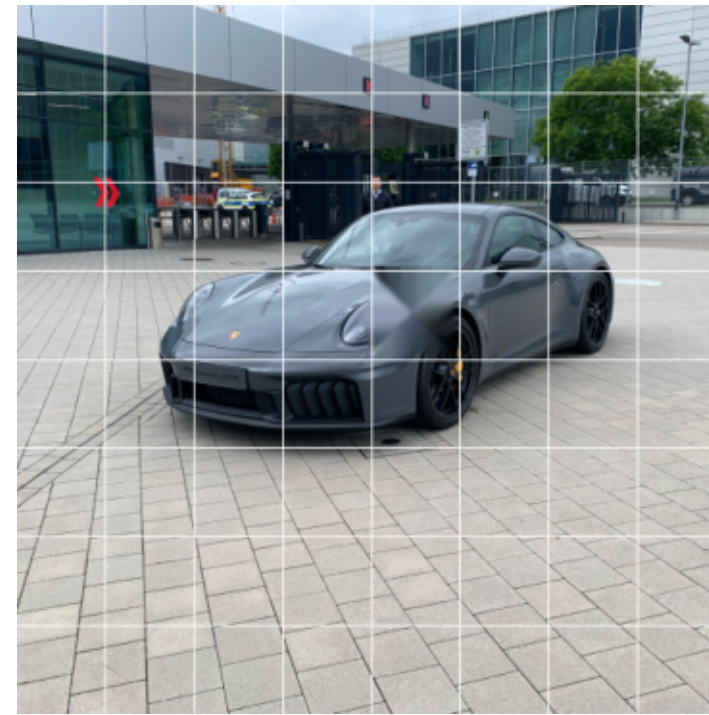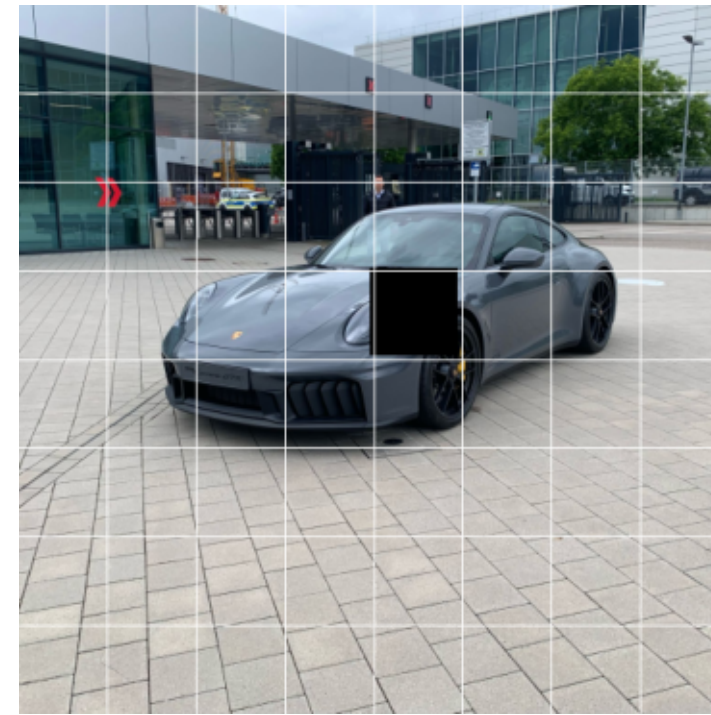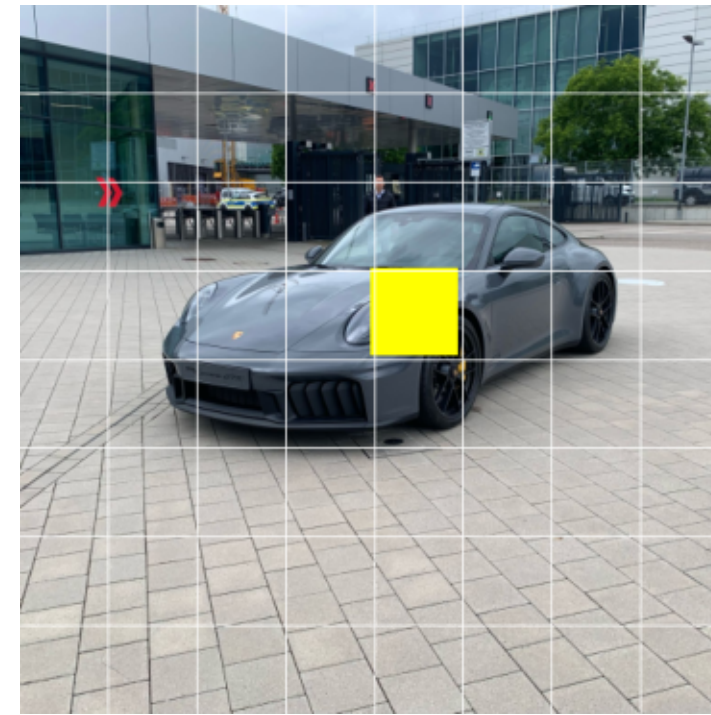

Supplement: supplementary_material [file rgb_perturbation_results.pdf › supplementary_material/figs/results/rgb_perturbation_results.pdf]

img\_00098\_label\_1.png

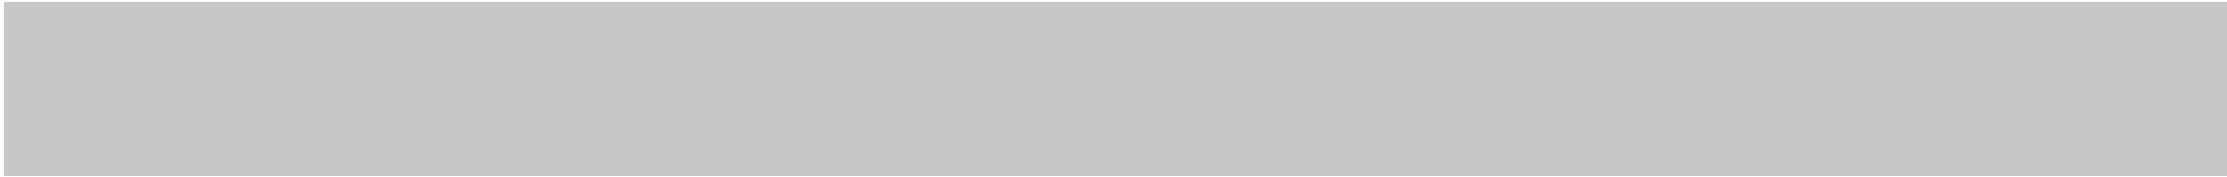

img\_00054\_label\_0.png

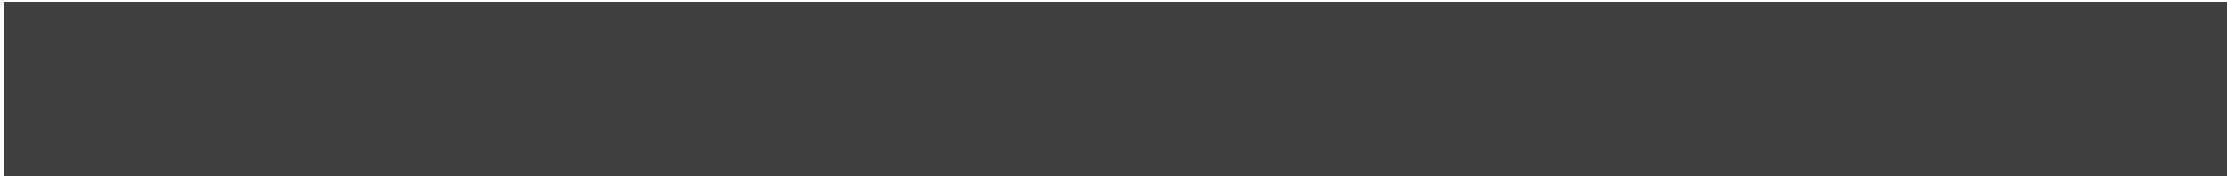

img\_00027\_label\_0.png

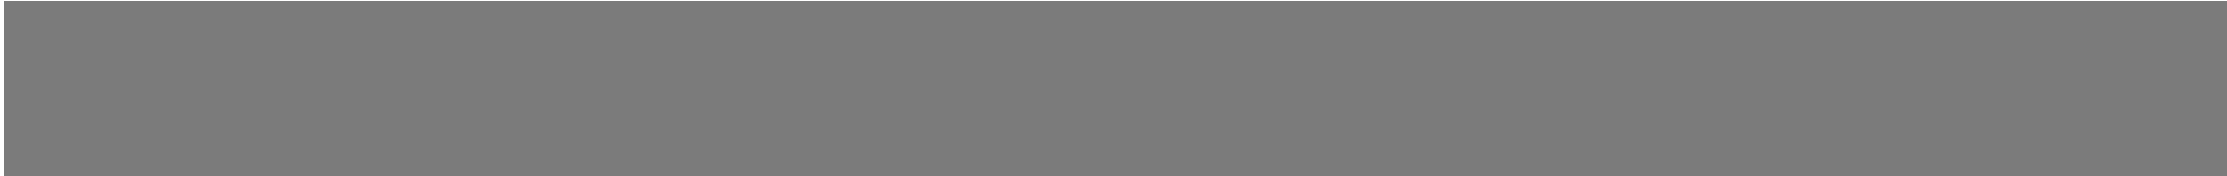

Supplement: supplementary_material [file shapeval_example.pdf › supplementary_material/figs/results/shapeval_example.pdf]
